# Supplementary material for: Glycosylation of plasma IgG in colorectal cancer prognosis
Source: PubMed Central journal article supplement (PMC4908421; doi:10.1038/srep28098), 2016-06-15
Supplement: srep28098-s1.pdf [file srep28098-s1.pdf]

## **SUPPLEMENTARY MATERIAL FOR**

### **Glycosylation of plasma IgG in colorectal cancer prognosis**

**Authors:** Evropi Theodoratou<sup>1,2,\*</sup>, Kujtim Thaçi<sup>3,\*</sup>, Felix Agakov<sup>4</sup>, Maria Timofeeva<sup>2</sup>, Jerko Štambuk<sup>3</sup>, Maja Pučić-Baković<sup>3</sup>, Frano Vučković<sup>3</sup>, Peter Orchard<sup>4</sup>, Anna Agakova<sup>4</sup>, Farhat VN Din<sup>2</sup>, Ewan Brown<sup>5</sup>, Pauline Rudd<sup>6</sup>, Susan M Farrington<sup>2</sup>, Malcolm G Dunlop<sup>2</sup>, Harry Campbell<sup>1,2,\*</sup>, Gordan Lauc<sup>2,7,\*</sup>

**1** Centre for Population Health Sciences, University of Edinburgh, Edinburgh, UK

**2** Colon Cancer Genetics Group, Institute of Genetics and Molecular Medicine, University of Edinburgh and Medical Research Council Human Genetics Unit, Edinburgh, UK

**3** Genos Glycoscience Research Laboratory, Zagreb, Croatia

**4** Pharmatics Limited, Edinburgh, UK

**5** Edinburgh Cancer Research Centre, University of Edinburgh, Edinburgh, UK

**6** National institute for bioprocessing research & training, Dublin, Ireland

**7** University of Zagreb Faculty of Pharmacy and Biochemistry, Zagreb, Croatia

\* Equal contribution from these authors

**Correspondence:** Dr Evropi Theodoratou, Centre for Population Health Sciences, University of Edinburgh, Edinburgh, UK, [e.theodoratou@ed.ac.uk](mailto:e.theodoratou@ed.ac.uk)

## Supplementary Box 1 Information about the estimators used in the classification analysis

**LASSO** - sparse logistic regression. This is a standard logistic regression model with a logit link function, and  $L_1$  penalties on the weights. To set the penalty parameter, we run 10-fold cross-validation over a set of 10 penalties in the range 0.001 to 0.1. We choose the penalty resulting in the minimum-deviance model.

**k-nearest neighbours** - k nearest neighbours with  $k=1$ . For a new input, this classifier predicts the class of the nearest input in the training data, measured by Euclidean distance.

**PAM** - Prediction Analysis for Microarrays. This is the "nearest-shrunken-centroid" classifier. To set the shrinkage parameter, we run 10-fold cross-validation over 31 equally spaced values in the range 0 to 1.5. We choose the parameter that produces the lowest mean error rate.

**Support Vector Machines** – kernel-based maximum-margin classifiers. We consider linear, square, cubic, and squared exponential (Gaussian) kernel functions with fixed hyperparameters.

**Naive Bayes** – factorized class-conditional classifiers with normal or kernel density estimator-based marginal distributions. The KDE bandwidth is selected automatically.

**Decision Trees** – non-parametric tree classifiers, with the internal nodes corresponding to predictors, and leaves encoding classification labels. Binary trees with the Gini impurity splitting criterion were used.

**Boosted stump classifiers** – aggregations of multiple boosted one-node decision trees (stumps), where each later stump focuses on previously misclassified samples, using a version of Adaboost.

**Supplementary Table 1 Glycans annotation and experimental variation for each glycan variable**

| GROUP                                        | Code  | GENOS Code   | Description                                                                                                                 | Formula                                                                      | Variation |
|----------------------------------------------|-------|--------------|-----------------------------------------------------------------------------------------------------------------------------|------------------------------------------------------------------------------|-----------|
| <i>Total IgG glycans (neutral + charged)</i> | IGP1  | GP1          | <i>The percentage of FA1 glycan in total IgG glycans</i>                                                                    | $GP1 / GP * 100$                                                             | 34.35     |
|                                              | IGP2  | GP2          | <i>The percentage of A2 glycan in total IgG glycans</i>                                                                     | $GP2 / GP * 100$                                                             | 34.02     |
|                                              | IGP3  | GP4          | <i>The percentage of FA2 glycan in total IgG glycans</i>                                                                    | $GP4 / GP * 100$                                                             | 2.45      |
|                                              | IGP4  | GP5          | <i>The percentage of M5 glycan in total IgG glycans</i>                                                                     | $GP5 / GP * 100$                                                             | 32.90     |
|                                              | IGP5  | GP6          | <i>The percentage of FA2B glycan in total IgG glycans</i>                                                                   | $GP6 / GP * 100$                                                             | 1.78      |
|                                              | IGP6  | GP7          | <i>The percentage of A2G1 glycan in total IgG glycans</i>                                                                   | $GP7 / GP * 100$                                                             | 29.37     |
|                                              | IGP7  | GP8          | <i>The percentage of FA2[6]G1 glycan in total IgG glycans</i>                                                               | $GP8 / GP * 100$                                                             | 10.82     |
|                                              | IGP8  | GP9          | <i>The percentage of FA2[3]G1 glycan in total IgG glycans</i>                                                               | $GP9 / GP * 100$                                                             | 6.71      |
|                                              | IGP9  | GP10         | <i>The percentage of FA2[6]BG1 glycan in total IgG glycans</i>                                                              | $GP10 / GP * 100$                                                            | 2.42      |
|                                              | IGP10 | GP11         | <i>The percentage of FA2[3]BG1 glycan in total IgG glycans</i>                                                              | $GP11 / GP * 100$                                                            | 31.34     |
|                                              | IGP11 | GP12         | <i>The percentage of A2G2 glycan in total IgG glycans</i>                                                                   | $GP12 / GP * 100$                                                            | 28.10     |
|                                              | IGP12 | GP13         | <i>The percentage of A2BG2 glycan in total IgG glycans</i>                                                                  | $GP13 / GP * 100$                                                            | 95.50     |
|                                              | IGP13 | GP14         | <i>The percentage of FA2G2 glycan in total IgG glycans</i>                                                                  | $GP14 / GP * 100$                                                            | 1.05      |
|                                              | IGP14 | GP15         | <i>The percentage of FA2BG2 glycan in total IgG glycans</i>                                                                 | $GP15 / GP * 100$                                                            | 12.56     |
|                                              | IGP15 | GP16         | <i>The percentage of FA2G1S1 glycan in total IgG glycans</i>                                                                | $GP16 / GP * 100$                                                            | 33.19     |
|                                              | IGP16 | GP17         | <i>The percentage of A2G2S1 glycan in total IgG glycans</i>                                                                 | $GP17 / GP * 100$                                                            | 112.42    |
|                                              | IGP17 | GP18         | <i>The percentage of FA2G2S1 glycan in total IgG glycans</i>                                                                | $GP18 / GP * 100$                                                            | 2.19      |
|                                              | IGP18 | GP19         | <i>The percentage of FA2BG2S1 glycan in total IgG glycans</i>                                                               | $GP19 / GP * 100$                                                            | 15.42     |
|                                              | IGP19 | GP20         | <i>Structure not determined</i>                                                                                             | $GP20 / GP * 100$                                                            | 104.69    |
|                                              | IGP20 | GP21         | <i>The percentage of A2G2S2 glycan in total IgG glycans</i>                                                                 | $GP21 / GP * 100$                                                            | 49.60     |
|                                              | IGP21 | GP22         | <i>The percentage of A2BG2S2 glycan in total IgG glycans</i>                                                                | $GP22 / GP * 100$                                                            | 96.00     |
|                                              | IGP22 | GP23         | <i>The percentage of FA2G2S2 glycan in total IgG glycans</i>                                                                | $GP23 / GP * 100$                                                            | 25.62     |
|                                              | IGP23 | GP24         | <i>The percentage of FA2BG2S2 glycan in total IgG glycans</i>                                                               | $GP24 / GP * 100$                                                            | 30.39     |
| <i>Total IgG glycans -</i>                   | IGP24 | FGS/(FG+FGS) | <i>The percentage of sialylation of fucosylated galactosylated structures without bisecting GlcNAc in total IgG glycans</i> | $SUM(GP16 + GP18 + GP23) / SUM(GP16 + GP18 + GP23 + GP8 + GP9 + GP14) * 100$ | 18.10     |

|                           |       |                             |                                                                                                                                     |                                                                                          |       |
|---------------------------|-------|-----------------------------|-------------------------------------------------------------------------------------------------------------------------------------|------------------------------------------------------------------------------------------|-------|
| <i>derived parameters</i> | IGP25 | FBGS/(FBG+FBGS)             | <i>The percentage of sialylation of fucosylated galactosylated structures with bisecting GlcNAc in total IgG glycans</i>            | $\frac{SUM(GP19 + GP24)}{SUM(GP19 + GP24 + GP10 + GP11 + GP15)} * 100$                   | 13.28 |
|                           | IGP26 | FGS/(F+FG+FGS)              | <i>The percentage of sialylation of all fucosylated structures without bisecting GlcNAc in total IgG glycans</i>                    | $\frac{SUM(GP16 + GP18 + GP23)}{SUM(GP16 + GP18 + GP23 + GP4 + GP8 + GP9 + GP14)} * 100$ | 8.10  |
|                           | IGP27 | FBGS/(FB+FBG+FBGS)          | <i>The percentage of sialylation of all fucosylated structures with bisecting GlcNAc in total IgG glycans</i>                       | $\frac{SUM(GP19 + GP24)}{SUM(GP19 + GP24 + GP6 + GP10 + GP11 + GP15)} * 100$             | 13.02 |
|                           | IGP28 | FG1S1/(FG1+FG1S1)           | <i>The percentage of monosialylation of fucosylated monogalactosylated structures without bisecting GlcNAc in total IgG glycans</i> | $\frac{GP16}{SUM(GP16 + GP8 + GP9)} * 100$                                               | 48.95 |
|                           | IGP29 | FG2S1/(FG2+FG2S1+FG2S2)     | <i>The percentage of monosialylation of fucosylated digalactosylated structures without bisecting GlcNAc in total IgG glycans</i>   | $\frac{GP18}{SUM(GP18 + GP14 + GP23)} * 100$                                             | 9.74  |
|                           | IGP30 | FG2S2/(FG2+FG2S1+FG2S2)     | <i>The percentage of disialylation of fucosylated digalactosylated structures without bisecting GlcNAc in total IgG glycans</i>     | $\frac{GP23}{SUM(GP23 + GP14 + GP18)} * 100$                                             | 22.02 |
|                           | IGP31 | FBG2S1/(FBG2+FBG2S1+FBG2S2) | <i>The percentage of monosialylation of fucosylated digalactosylated structures with bisecting GlcNAc in total IgG glycans</i>      | $\frac{GP19}{SUM(GP19 + GP15 + GP24)} * 100$                                             | 9.54  |
|                           | IGP32 | FBG2S2/(FBG2+FBG2S1+FBG2S2) | <i>The percentage of disialylation of fucosylated digalactosylated structures with bisecting GlcNAc in total IgG glycans</i>        | $\frac{GP24}{SUM(GP24 + GP15 + GP19)} * 100$                                             | 44.66 |
|                           | IGP33 | $F^{totalS1}/F^{totalS2}$   | <i>Ratio of all fucosylated monosialylated and disialylated structures (+/- bisecting GlyNAc) in total IgG glycans</i>              | $\frac{SUM(GP16 + GP18 + GP19)}{SUM(GP23 + GP24)}$                                       | 34.85 |
|                           | IGP34 | FS1/FS2                     | <i>Ratio of fucosylated monosialylated and disialylated structures (without bisecting GlcNAc) in total IgG glycans</i>              | $\frac{SUM(GP16 + GP18)}{GP23}$                                                          | 29.15 |
|                           | IGP35 | FBS1/FBS2                   | <i>Ratio of fucosylated monosialylated and disialylated structures (with bisecting GlcNAc) in total IgG glycans</i>                 | $\frac{GP19}{GP24}$                                                                      | 45.81 |
|                           | IGP36 | $FBS^{total}/FS^{total}$    | <i>Ratio of all fucosylated sialylated structures with and without bisecting GlcNAc in total IgG glycans</i>                        | $\frac{SUM(GP19 + GP24)}{SUM(GP16 + GP18 + GP23)}$                                       | 6.69  |
|                           | IGP37 | FBS1/FS1                    | <i>Ratio of fucosylated monosialylated structures with and without bisecting GlcNAc in total IgG glycans</i>                        | $\frac{GP19}{SUM(GP16 + GP18)}$                                                          | 5.67  |

|                     |       |                   |                                                                                                                                 |                                         |       |
|---------------------|-------|-------------------|---------------------------------------------------------------------------------------------------------------------------------|-----------------------------------------|-------|
|                     | IGP38 | FBS1/(FS1+FBS 1)  | <i>The incidence of bisecting GlcNAc in all fucosylated monosialylated structures in total IgG glycans in total IgG glycans</i> | $GP19 / \text{SUM}(GP16 + GP18 + GP19)$ | 5.48  |
|                     | IGP39 | FBS2/FS2          | <i>Ratio of fucosylated disialylated structures with and without bisecting GlcNAc in total IgG glycans</i>                      | $GP24 / GP23$                           | 3.89  |
|                     | IGP40 | FBS2/(FS2+FBS 2)  | <i>The incidence of bisecting GlcNAc in all fucosylated disialylated structures in total IgG glycans</i>                        | $GP24 / \text{SUM}(GP23 + GP24)$        | 4.44  |
| Neutral IgG glycans | IGP41 | GP1 <sup>n</sup>  | <i>The percentage of FA1 glycan in total neutral IgG glycans (GP<sup>n</sup>)</i>                                               | $GP1 / GP^n * 100$                      | 35.92 |
|                     | IGP42 | GP2 <sup>n</sup>  | <i>The percentage of A2 glycan in total neutral IgG glycans (GP<sup>n</sup>)</i>                                                | $GP2 / GP^n * 100$                      | 37.40 |
|                     | IGP43 | GP4 <sup>n</sup>  | <i>The percentage of FA2 glycan in total neutral IgG glycans (GP<sup>n</sup>)</i>                                               | $GP4 / GP^n * 100$                      | 1.27  |
|                     | IGP44 | GP5 <sup>n</sup>  | <i>The percentage of M5 glycan in total neutral IgG glycans (GP<sup>n</sup>)</i>                                                | $GP5 / GP^n * 100$                      | 36.24 |
|                     | IGP45 | GP6 <sup>n</sup>  | <i>The percentage of FA2B glycan in total neutral IgG glycans (GP<sup>n</sup>)</i>                                              | $GP6 / GP^n * 100$                      | 1.02  |
|                     | IGP46 | GP7 <sup>n</sup>  | <i>The percentage of A2G1 glycan in total neutral IgG glycans (GP<sup>n</sup>)</i>                                              | $GP7 / GP^n * 100$                      | 32.32 |
|                     | IGP47 | GP8 <sup>n</sup>  | <i>The percentage of FA2[6]G1 glycan in total neutral IgG glycans (GP<sup>n</sup>)</i>                                          | $GP8 / GP^n * 100$                      | 2.69  |
|                     | IGP48 | GP9 <sup>n</sup>  | <i>The percentage of FA2[3]G1 glycan in total neutral IgG glycans (GP<sup>n</sup>)</i>                                          | $GP9 / GP^n * 100$                      | 2.06  |
|                     | IGP49 | GP10 <sup>n</sup> | <i>The percentage of FA2[6]BG1 glycan in total neutral IgG glycans (GP<sup>n</sup>)</i>                                         | $GP10 / GP^n * 100$                     | 0.91  |
|                     | IGP50 | GP11 <sup>n</sup> | <i>The percentage of FA2[3]BG1 glycan in total neutral IgG glycans (GP<sup>n</sup>)</i>                                         | $GP11 / GP^n * 100$                     | 37.96 |
|                     | IGP51 | GP12 <sup>n</sup> | <i>The percentage of A2G2 glycan in total neutral IgG glycans (GP<sup>n</sup>)</i>                                              | $GP12 / GP^n * 100$                     | 29.22 |
|                     | IGP52 | GP13 <sup>n</sup> | <i>The percentage of A2BG2 glycan in total neutral IgG glycans (GP<sup>n</sup>)</i>                                             | $GP13 / GP^n * 100$                     | 92.53 |

|                                          |       |                                         |                                                                                                                                |                                                                          |       |
|------------------------------------------|-------|-----------------------------------------|--------------------------------------------------------------------------------------------------------------------------------|--------------------------------------------------------------------------|-------|
|                                          | IGP53 | GP14 <sup>n</sup>                       | <i>The percentage of FA2G2 glycan in total neutral IgG glycans (GP<sup>n</sup>)</i>                                            | $GP14 / GP^n * 100$                                                      | 0.58  |
|                                          | IGP54 | GP15 <sup>n</sup>                       | <i>The percentage of FA2BG2 glycan in total neutral IgG glycans (GP<sup>n</sup>)</i>                                           | $GP15 / GP^n * 100$                                                      | 13.13 |
| Neutral IgG glycans - derived parameters | IGP55 | G0 <sup>n</sup>                         | <i>The percentage of agalactosylated structures in total neutral IgG glycans</i>                                               | $SUM(GP1^n: GP4^n + GP6^n)$                                              | 1.24  |
|                                          | IGP56 | G1 <sup>n</sup>                         | <i>The percentage of monogalactosylated structures in total neutral IgG glycans</i>                                            | $SUM(GP7^n: GP11^n)$                                                     | 1.09  |
|                                          | IGP57 | G2 <sup>n</sup>                         | <i>The percentage of digalactosylated structures in total neutral IgG glycans</i>                                              | $SUM(GP12^n: GP15^n)$                                                    | 1.51  |
|                                          | IGP58 | F <sup>n total</sup>                    | <i>The percentage of all fucosylated structures (+/- bisecting GlcNAc) in total neutral IgG glycans</i>                        | $SUM(GP1^n+ GP4^n+ GP6^n+ GP8^n+ GP9^n+ GP10^n+ GP11^n+ GP14^n+ GP15^n)$ | 44.04 |
|                                          | IGP59 | FG0 <sup>n total</sup> /G0 <sup>n</sup> | <i>The percentage of fucosylation of agalactosylated structures in total neutral IgG glycans</i>                               | $SUM(GP1^n+ GP4^n+ GP6^n) / G0^n * 100$                                  | 40.29 |
|                                          | IGP60 | FG1 <sup>n total</sup> /G1 <sup>n</sup> | <i>The percentage of fucosylation of monogalactosylated structures in total neutral IgG glycans</i>                            | $SUM(GP8^n+ GP9^n+ GP10^n+ GP11^n) / G1^n * 100$                         | 20.74 |
|                                          | IGP61 | FG2 <sup>n total</sup> /G2 <sup>n</sup> | <i>The percentage of fucosylation of digalactosylated structures in total neutral IgG glycans</i>                              | $SUM(GP14^n+ GP15) / G2^n * 100$                                         | 81.14 |
|                                          | IGP62 | F <sup>n</sup>                          | <i>The percentage of fucosylated structures (without bisecting GlcNAc) in total neutral IgG glycans</i>                        | $SUM(GP1^n+ GP4^n+ GP8^n+ GP9^n+ GP14^n)$                                | 11.33 |
|                                          | IGP63 | FG0 <sup>n</sup> /G0 <sup>n</sup>       | <i>The percentage of fucosylation of agalactosylated structures (without bisecting GlcNAc) in total neutral IgG glycans</i>    | $SUM(GP1^n+ GP4^n) / G0^n * 100$                                         | 4.70  |
|                                          | IGP64 | FG1 <sup>n</sup> /G1 <sup>n</sup>       | <i>The percentage of fucosylation of monogalactosylated structures (without bisecting GlcNAc) in total neutral IgG glycans</i> | $SUM(GP8^n+ GP9^n) / G1^n * 100$                                         | 5.89  |
|                                          | IGP65 | FG2 <sup>n</sup> /G2 <sup>n</sup>       | <i>The percentage of fucosylation of digalactosylated structures (without bisecting GlcNAc) in total neutral IgG glycans</i>   | $GP14^n / G2^n * 100$                                                    | 57.82 |
|                                          | IGP66 | FB <sup>n</sup>                         | <i>The percentage of fucosylated structures (with bisecting GlcNAc) in total neutral IgG glycans</i>                           | $SUM(GP6^n + GP10^n + GP11^n + GP15^n)$                                  | 2.27  |
|                                          | IGP67 | FBG0 <sup>n</sup> /G0 <sup>n</sup>      | <i>The percentage of fucosylation of agalactosylated structures (with bisecting GlcNAc) in total neutral IgG</i>               | $GP6^n / G0^n * 100$                                                     | 1.06  |

|       |                                                            | <i>glycans</i>                                                                                                                                                        |                                     |        |
|-------|------------------------------------------------------------|-----------------------------------------------------------------------------------------------------------------------------------------------------------------------|-------------------------------------|--------|
| IGP68 | FBG1 <sup>n</sup> /G1 <sup>n</sup>                         | <i>The percentage of fucosylation of monogalactosylated structures (with bisecting GlcNAc) in total neutral IgG glycans</i>                                           | $SUM(GP10^n + GP11^n) / G1^n * 100$ | 2.70   |
| IGP69 | FBG2 <sup>n</sup> /G2 <sup>n</sup>                         | <i>The percentage of fucosylation of digalactosylated structures (with bisecting GlcNAc) in total neutral IgG glycans</i>                                             | $GP15^n / G2^n * 100$               | 21.03  |
| IGP70 | FB <sup>n</sup> /F <sup>n</sup>                            | <i>Ratio of fucosylated structures with and without bisecting GlcNAc in total neutral IgG glycans</i>                                                                 | $FB^n / F^n * 100$                  | 3.39   |
| IGP71 | FB <sup>n</sup> /F <sup>n total</sup>                      | <i>The incidence of bisecting GlcNAc in all fucosylated structures in total neutral IgG glycans</i>                                                                   | $FB^n / F^{n total} * 100$          | 3.43   |
| IGP72 | F <sup>n</sup> /(B <sup>n</sup> + FB <sup>n</sup> )        | <i>Ratio of fucosylated non-bisecting GlcNAc structures and all structures with bisecting GlcNAc in total neutral IgG glycans</i>                                     | $F^n / (GP13^n + FB^n)$             | 6.00   |
| IGP73 | B <sup>n</sup> /(F <sup>n</sup> + FB <sup>n</sup> )        | <i>Ratio of structures with bisecting GlcNAc and all fucosylated structures (+/- bisecting GlcNAc) in total neutral IgG glycans</i>                                   | $GP13^n / (F^n + FB^n) * 1000$      | 92.61  |
| IGP74 | FBG2 <sup>n</sup> /FG2 <sup>n</sup>                        | <i>Ratio of fucosylated digalactosylated structures with and without bisecting GlcNAc in total neutral IgG glycans</i>                                                | $GP15^n / GP14^n$                   | 28.12  |
| IGP75 | FBG2 <sup>n</sup> /(FG2 <sup>n</sup> + FBG2 <sup>n</sup> ) | <i>The incidence of bisecting GlcNAc in all fucosylated digalactosylated structures in total neutral IgG glycans</i>                                                  | $GP15^n / (GP14^n + GP15^n) * 100$  | 28.43  |
| IGP76 | FG2 <sup>n</sup> /(BG2 <sup>n</sup> + FBG2 <sup>n</sup> )  | <i>Ratio of fucosylated digalactosylated non-bisecting GlcNAc structures and all digalactosylated structures with bisecting GlcNAc in total neutral IgG glycans</i>   | $GP14^n / (GP13^n + GP15^n)$        | 52.69  |
| IGP77 | BG2 <sup>n</sup> /(FG2 <sup>n</sup> + FBG2 <sup>n</sup> )  | <i>Ratio of digalactosylated structures with bisecting GlcNAc and all fucosylated digalactosylated structures (+/- bisecting GlcNAc) in total neutral IgG glycans</i> | $GP13^n / (GP14^n + GP15^n) * 1000$ | 106.54 |

Supplementary Table 2 All cause analysis

| Code                                                     | Glycan     | Dead<br>(N=489) | Survived<br>(N=740) | Crude model (n=1229) |                       | Model I (AJCC, age, sex, n=1229) |                       | Model II (AJCC, age, sex,<br>time between sample and<br>surgery, operation type, bmi,<br>CRP n=952) |                      |
|----------------------------------------------------------|------------|-----------------|---------------------|----------------------|-----------------------|----------------------------------|-----------------------|-----------------------------------------------------------------------------------------------------|----------------------|
|                                                          |            | Mean (SD)       | Mean (SD)           | HR (95% CI)          | p-value               | HR (95% CI)                      | p-value               | HR (95% CI)                                                                                         | p-value              |
| <b>Total IgG glycans (neutral and charged); Measured</b> |            |                 |                     |                      |                       |                                  |                       |                                                                                                     |                      |
| IGP3                                                     | Continuous | 26.39 (7.33)    | 23.87 (6.37)        | 1.04 (1.03, 1.06)    | 4.7x10 <sup>-12</sup> | 1.04 (1.03, 1.06)                | 7.5x10 <sup>-11</sup> | 1.04 (1.02, 1.05)                                                                                   | 7.5x10 <sup>-6</sup> |
|                                                          | RT         |                 |                     | 1.36 (1.24, 1.48)    | 5.9x10 <sup>-11</sup> | 1.35 (1.23, 1.48)                | 5.0x10 <sup>-10</sup> | 1.28 (1.14, 1.43)                                                                                   | 2.6x10 <sup>-5</sup> |
| IGP5                                                     | Continuous | 6.34 (1.88)     | 5.79 (1.57)         | 1.15 (1.09, 1.21)    | 1.5x10 <sup>-8</sup>  | 1.14 (1.08, 1.20)                | 3.5x10 <sup>-7</sup>  | 1.11 (1.04, 1.18)                                                                                   | 0.001                |
|                                                          | RT         |                 |                     | 1.28 (1.17, 1.40)    | 9.7x10 <sup>-8</sup>  | 1.27 (1.15, 1.39)                | 1.4x10 <sup>-6</sup>  | 1.19 (1.06, 1.34)                                                                                   | 0.002                |
| IGP7                                                     | Continuous | 18.26 (2.21)    | 18.67 (1.81)        | 0.91 (0.87, 0.96)    | 0.0001                | 0.93 (0.88, 0.97)                | 0.001                 | 0.92 (0.87, 0.97)                                                                                   | 0.003                |
|                                                          | RT         |                 |                     | 0.85 (0.77, 0.93)    | 0.001                 | 0.87 (0.79, 0.95)                | 0.003                 | 0.87 (0.78, 0.97)                                                                                   | 0.01                 |
| IGP8                                                     | Continuous | 9.38 (1.36)     | 9.83 (1.35)         | 0.83 (0.78, 0.89)    | 3.4x10 <sup>-8</sup>  | 0.86 (0.80, 0.91)                | 2.6x10 <sup>-6</sup>  | 0.87 (0.81, 0.94)                                                                                   | 0.0002               |
|                                                          | RT         |                 |                     | 0.78 (0.74, 0.85)    | 3.4x10 <sup>-8</sup>  | 0.81 (0.74, 0.89)                | 4.4x10 <sup>-6</sup>  | 0.83 (0.75, 0.92)                                                                                   | 0.0003               |
| IGP9                                                     | Continuous | 5.45 (1.23)     | 5.48 (1.15)         | 0.96 (0.89, 1.04)    | 0.35                  | 0.96 (0.88, 1.03)                | 0.26                  | 0.95 (0.87, 1.04)                                                                                   | 0.29                 |
|                                                          | RT         |                 |                     | 0.95 (0.87, 1.04)    | 0.25                  | 0.94 (0.85, 1.03)                | 0.16                  | 0.93 (0.84, 1.04)                                                                                   | 0.20                 |
| IGP13                                                    | Continuous | 10.19 (3.13)    | 11.44 (3.13)        | 0.89 (0.87, 0.92)    | 8.9x10 <sup>-13</sup> | 0.90 (0.87, 0.93)                | 1.4x10 <sup>-10</sup> | 0.92 (0.89, 0.96)                                                                                   | 4.0x10 <sup>-5</sup> |
|                                                          | RT         |                 |                     | 0.70 (0.64, 0.77)    | 5.2x10 <sup>-14</sup> | 0.71 (0.65, 0.79)                | 1.6x10 <sup>-11</sup> | 0.77 (0.68, 0.86)                                                                                   | 9.6x10 <sup>-6</sup> |
| IGP14                                                    | Continuous | 1.38 (0.41)     | 1.50 (0.43)         | 0.55 (0.44, 0.70)    | 4.0x10 <sup>-7</sup>  | 0.59 (0.46, 0.74)                | 5.9x10 <sup>-6</sup>  | 0.70 (0.53, 0.92)                                                                                   | 0.01                 |
|                                                          | RT         |                 |                     | 0.78 (0.71, 0.85)    | 9.0x10 <sup>-8</sup>  | 0.80 (0.73, 0.88)                | 2.0x10 <sup>-6</sup>  | 0.86 (0.77, 0.96)                                                                                   | 0.007                |
| IGP17                                                    | Continuous | 7.78 (2.29)     | 8.47 (2.34)         | 0.89 (0.85, 0.93)    | 9.3x10 <sup>-8</sup>  | 0.89 (0.85, 0.93)                | 1.3x10 <sup>-7</sup>  | 0.91 (0.86, 0.96)                                                                                   | 0.0002               |
|                                                          | RT         |                 |                     | 0.76 (0.70, 0.83)    | 4.4x10 <sup>-9</sup>  | 0.76 (0.69, 0.83)                | 8.4x10 <sup>-9</sup>  | 0.79 (0.71, 0.89)                                                                                   | 4.9x10 <sup>-5</sup> |
| IGP18                                                    | Continuous | 1.87 (0.38)     | 1.90 (0.39)         | 0.85 (0.67, 1.08)    | 0.18                  | 0.81 (0.65, 1.02)                | 0.08                  | 0.94 (0.73, 1.22)                                                                                   | 0.64                 |
|                                                          | RT         |                 |                     | 0.94 (0.86, 1.03)    | 0.18                  | 0.93 (0.85, 1.01)                | 0.10                  | 0.98 (0.89, 1.08)                                                                                   | 0.70                 |
| <b>Sialylation</b>                                       |            |                 |                     |                      |                       |                                  |                       |                                                                                                     |                      |
| IGP24                                                    | Continuous | 24.78 (3.20)    | 24.95 (3.10)        | 0.99 (0.96, 1.01)    | 0.33                  | 0.97 (0.95, 1.00)                | 0.06                  | 0.98 (0.95, 1.01)                                                                                   | 0.18                 |
|                                                          | RT         |                 |                     | 0.95 (0.87, 1.04)    | 0.29                  | 0.92 (0.84, 1.00)                | 0.06                  | 0.93 (0.84, 1.03)                                                                                   | 0.18                 |
| IGP25                                                    | Continuous | 32.83 (6.17)    | 32.58 (6.34)        | 1.01 (0.99, 1.02)    | 0.38                  | 1.00 (0.99, 1.02)                | 0.67                  | 1.01 (0.99, 1.02)                                                                                   | 0.48                 |
|                                                          | RT         |                 |                     | 1.04 (0.95, 1.14)    | 0.37                  | 1.02 (0.93, 1.12)                | 0.65                  | 1.04 (0.94, 1.15)                                                                                   | 0.47                 |
| IGP26                                                    | Continuous | 16.35 (3.63)    | 17.35 (3.61)        | 0.94 (0.91, 0.96)    | 7.3x10 <sup>-7</sup>  | 0.93 (0.91, 0.96)                | 2.7x10 <sup>-7</sup>  | 0.94 (0.92, 0.97)                                                                                   | 0.0003               |
|                                                          | RT         |                 |                     | 0.79 (0.72, 0.86)    | 1.6x10 <sup>-7</sup>  | 0.77 (0.71, 0.85)                | 6.2x10 <sup>-8</sup>  | 0.81 (0.72, 0.90)                                                                                   | 0.0001               |



|                            |            |              |              |                      |                       |                      |                       |                      |                      |
|----------------------------|------------|--------------|--------------|----------------------|-----------------------|----------------------|-----------------------|----------------------|----------------------|
| IGP27                      | Continuous | 21.21 (4.88) | 21.82 (4.96) | 0.98 (0.96, 1.00)    | 0.04                  | 0.98 (0.96, 1.00)    | 0.03                  | 0.99 (0.97, 1.01)    | 0.30                 |
|                            | RT         |              |              | 0.91 (0.83, 0.99)    | 0.04                  | 0.91 (0.83, 0.99)    | 0.03                  | 0.95 (0.86, 1.05)    | 0.30                 |
| IGP29                      | Continuous | 40.18 (2.99) | 39.51 (2.77) | 1.07 (1.04, 1.10)    | 1.2x10 <sup>-5</sup>  | 1.03 (1.00, 1.06)    | 0.03                  | 1.01 (0.98, 1.05)    | 0.47                 |
|                            | RT         |              |              | 1.23 (1.12, 1.35)    | 9.2x10 <sup>-6</sup>  | 1.12 (1.03, 1.23)    | 0.10                  | 1.06 (0.95, 1.18)    | 0.28                 |
| IGP31                      | Continuous | 37.02 (3.87) | 36.41 (3.97) | 1.04 (1.01, 1.06)    | 0.002                 | 1.03 (1.01, 1.05)    | 0.006                 | 1.03 (1.00, 1.05)    | 0.04                 |
|                            | RT         |              |              | 1.15 (1.05, 1.26)    | 0.002                 | 1.14 (1.04, 1.24)    | 0.004                 | 1.12 (1.01, 1.24)    | 0.03                 |
| <b>Bisecting GlcNAc</b>    |            |              |              |                      |                       |                      |                       |                      |                      |
| IGP36                      | Continuous | 0.30 (0.08)  | 0.28 (0.07)  | 8.74 (2.87, 26.66)   | 0.0001                | 7.95 (2.43, 26.01)   | 0.001                 | 9.40 (2.30, 38.49)   | 0.002                |
|                            | RT         |              |              | 1.19 (1.09, 1.30)    | 0.0001                | 1.18 (1.07, 1.29)    | 0.001                 | 1.19 (1.06, 1.33)    | 0.002                |
| IGP37                      | Continuous | 0.17 (0.05)  | 0.16 (0.05)  | 19.00 (3.31, 109.06) | 0.001                 | 19.22 (3.12, 118.60) | 0.001                 | 30.56 (3.50, 267.02) | 0.002                |
|                            | RT         |              |              | 1.16 (1.06, 1.27)    | 0.001                 | 1.16 (1.06, 1.27)    | 0.002                 | 1.18 (1.06, 1.32)    | 0.003                |
| IGP38                      | Continuous | 0.14 (0.04)  | 0.14 (0.03)  | 76.90 (6.38, 927.03) | 0.001                 | 73.95 (5.58, 980.16) | 0.001                 | 126.7 (5.94, 2701)   | 0.002                |
|                            | RT         |              |              | 1.17 (1.07, 1.28)    | 0.001                 | 1.16 (1.06, 1.28)    | 0.001                 | 1.19 (1.06, 1.32)    | 0.002                |
| IGP39                      | Continuous | 1.35 (0.32)  | 1.27 (0.30)  | 1.82 (1.39, 2.39)    | 1.5x10 <sup>-5</sup>  | 1.66 (1.26, 2.19)    | 0.0003                | 1.62 (1.16, 2.27)    | 0.005                |
|                            | RT         |              |              | 1.22 (1.11, 1.33)    | 1.4x10 <sup>-5</sup>  | 1.19 (1.09, 1.30)    | 0.0002                | 1.17 (1.05, 1.31)    | 0.005                |
| IGP40                      | Continuous | 0.56 (0.06)  | 0.55 (0.06)  | 30.19 (6.24, 146.08) | 2.3x10 <sup>-5</sup>  | 19.39 (3.90, 96.34)  | 0.0003                | 13.96 (2.03, 96.03)  | 0.007                |
|                            | RT         |              |              | 1.22 (1.11, 1.33)    | 1.9x10 <sup>-5</sup>  | 1.19 (1.08, 1.30)    | 0.0002                | 1.17 (1.05, 1.30)    | 0.005                |
| <b>Neutral IgG glycans</b> |            |              |              |                      |                       |                      |                       |                      |                      |
| IGP43                      | Continuous | 32.33 (8.02) | 29.56 (7.02) | 1.04 (1.03, 1.05)    | 3.7x10 <sup>-12</sup> | 1.04 (1.03, 1.05)    | 1.2x10 <sup>-10</sup> | 1.03 (1.02, 1.05)    | 1.0x10 <sup>-5</sup> |
|                            | RT         |              |              | 1.36 (1.24, 1.49)    | 4.3x10 <sup>-11</sup> | 1.35 (1.22, 1.48)    | 6.9x10 <sup>-10</sup> | 1.28 (1.14, 1.43)    | 2.6x10 <sup>-5</sup> |
| IGP45                      | Continuous | 7.78 (2.07)  | 7.18 (1.76)  | 1.13 (1.08, 1.18)    | 4.9x10 <sup>-8</sup>  | 1.12 (1.07, 1.17)    | 2.0x10 <sup>-6</sup>  | 1.09 (1.03, 1.15)    | 0.002                |
|                            | RT         |              |              | 1.27 (1.16, 1.39)    | 2.9x10 <sup>-7</sup>  | 1.24 (1.13, 1.37)    | 9.2x10 <sup>-6</sup>  | 1.17 (1.05, 1.31)    | 0.006                |
| IGP47                      | Continuous | 22.59 (3.09) | 23.32 (2.52) | 0.92 (0.89, 0.95)    | 1.1x10 <sup>-6</sup>  | 0.93 (0.90, 0.96)    | 5.0x10 <sup>-6</sup>  | 0.93 (0.90, 0.97)    | 0.0002               |
|                            | RT         |              |              | 0.81 (0.74, 0.88)    | 4.7x10 <sup>-6</sup>  | 0.81 (0.74, 0.89)    | 1.4x10 <sup>-5</sup>  | 0.83 (0.74, 0.92)    | 0.001                |
| IGP48                      | Continuous | 11.60 (1.81) | 12.28 (1.75) | 0.85 (0.81, 0.89)    | 1.6x10 <sup>-10</sup> | 0.86 (0.82, 0.91)    | 8.8x10 <sup>-9</sup>  | 0.88 (0.83, 0.93)    | 1.3x10 <sup>-5</sup> |
|                            | RT         |              |              | 0.74 (0.68, 0.81)    | 1.5x10 <sup>-10</sup> | 0.76 (0.70, 0.84)    | 1.0x10 <sup>-8</sup>  | 0.79 (0.71, 0.88)    | 1.5x10 <sup>-5</sup> |
| IGP49                      | Continuous | 6.73 (1.54)  | 6.85 (1.46)  | 0.95 (0.89, 1.01)    | 0.08                  | 0.94 (0.88, 1.00)    | 0.04                  | 0.94 (0.87, 1.01)    | 0.09                 |
|                            | RT         |              |              | 0.91 (0.83, 1.00)    | 0.05                  | 0.90 (0.82, 0.98)    | 0.02                  | 0.90 (0.81, 1.01)    | 0.06                 |
| IGP53                      | Continuous | 12.70 (4.29) | 14.39 (4.37) | 0.92 (0.90, 0.94)    | 3.9x10 <sup>-12</sup> | 0.93 (0.91, 0.95)    | 1.9x10 <sup>-10</sup> | 0.94 (0.92, 0.97)    | 4.7x10 <sup>-5</sup> |
|                            | RT         |              |              | 0.70 (0.64, 0.77)    | 8.5x10 <sup>-14</sup> | 0.71 (0.65, 0.79)    | 1.0x10 <sup>-11</sup> | 0.76 (0.68, 0.86)    | 7.4x10 <sup>-6</sup> |
| IGP54                      | Continuous | 1.72 (0.54)  | 1.89 (0.59)  | 0.64 (0.54, 0.75)    | 1.7x10 <sup>-7</sup>  | 0.66 (0.55, 0.78)    | 1.5x10 <sup>-6</sup>  | 0.75 (0.61, 0.92)    | 0.005                |
|                            | RT         |              |              | 0.77 (0.71, 0.85)    | 3.4x10 <sup>-8</sup>  | 0.79 (0.72, 0.87)    | 4.5x10 <sup>-7</sup>  | 0.85 (0.76, 0.95)    | 0.003                |

| <b>Galactosylation</b>                        |            |              |              |                    |                       |                    |                       |                    |                      |
|-----------------------------------------------|------------|--------------|--------------|--------------------|-----------------------|--------------------|-----------------------|--------------------|----------------------|
| IGP55                                         | Continuous | 41.15 (9.19) | 37.69 (8.09) | 1.04 (1.03, 1.05)  | 1.2x10 <sup>-13</sup> | 1.04 (1.03, 1.05)  | 5.9x10 <sup>-12</sup> | 1.03 (1.02, 1.04)  | 2.0x10 <sup>-6</sup> |
|                                               | RT         |              |              | 1.39 (1.27, 1.53)  | 1.0x10 <sup>-12</sup> | 1.38 (1.26, 1.52)  | 2.7x10 <sup>-11</sup> | 1.31 (1.16, 1.47)  | 5.5x10 <sup>-6</sup> |
| IGP56                                         | Continuous | 42.72 (4.71) | 44.26 (3.56) | 0.93 (0.91, 0.95)  | 1.7x10 <sup>-12</sup> | 0.93 (0.92, 0.95)  | 2.2x10 <sup>-11</sup> | 0.94 (0.92, 0.96)  | 2.1x10 <sup>-7</sup> |
|                                               | RT         |              |              | 0.75 (0.69, 0.83)  | 2.2x10 <sup>-9</sup>  | 0.76 (0.69, 0.83)  | 8.3x10 <sup>-9</sup>  | 0.78 (0.69, 0.87)  | 1.3x10 <sup>-5</sup> |
| IGP57                                         | Continuous | 15.65 (5.00) | 17.61 (5.15) | 0.94 (0.92, 0.95)  | 5.9x10 <sup>-12</sup> | 0.94 (0.92, 0.96)  | 4.2x10 <sup>-10</sup> | 0.95 (0.93, 0.98)  | 0.0001               |
|                                               | RT         |              |              | 0.71 (0.65, 0.78)  | 2.5x10 <sup>-13</sup> | 0.72 (0.66, 0.80)  | 3.6x10 <sup>-11</sup> | 0.78 (0.69, 0.87)  | 2.4x10 <sup>-5</sup> |
| <b>Core fucosylation and bisecting GlcNAc</b> |            |              |              |                    |                       |                    |                       |                    |                      |
| IGP62                                         | Continuous | 79.47 (3.74) | 79.77 (3.46) | 0.99 (0.96, 1.01)  | 0.27                  | 0.99 (0.96, 1.02)  | 0.42                  | 0.99 (0.96, 1.02)  | 0.41                 |
|                                               | RT         |              |              | 0.96 (0.87, 1.05)  | 0.32                  | 0.97 (0.88, 1.06)  | 0.52                  | 0.96 (0.86, 1.07)  | 0.48                 |
| IGP63                                         | Continuous | 78.81 (4.29) | 78.69 (4.11) | 1.01 (0.99, 1.03)  | 0.34                  | 1.01 (0.99, 1.03)  | 0.29                  | 1.01 (0.98, 1.04)  | 0.51                 |
|                                               | RT         |              |              | 1.05 (0.96, 1.15)  | 0.30                  | 1.06 (0.96, 1.16)  | 0.24                  | 1.04 (0.93, 1.16)  | 0.46                 |
| IGP64                                         | Continuous | 80.03 (3.79) | 80.45 (3.56) | 0.98 (0.96, 1.00)  | 0.10                  | 0.98 (0.96, 1.01)  | 0.18                  | 0.98 (0.95, 1.01)  | 0.25                 |
|                                               | RT         |              |              | 0.93 (0.85, 1.02)  | 0.12                  | 0.95 (0.86, 1.04)  | 0.24                  | 0.94 (0.85, 1.05)  | 0.31                 |
| IGP66                                         | Continuous | 17.29 (3.20) | 16.97 (2.90) | 1.02 (0.99, 1.05)  | 0.14                  | 1.01 (0.98, 1.05)  | 0.38                  | 1.01 (0.97, 1.05)  | 0.64                 |
|                                               | RT         |              |              | 1.06 (0.97, 1.16)  | 0.19                  | 1.03 (0.94, 1.13)  | 0.50                  | 1.02 (0.91, 1.14)  | 0.73                 |
| IGP67                                         | Continuous | 19.15 (3.88) | 19.30 (3.65) | 0.99 (0.96, 1.01)  | 0.26                  | 0.98 (0.96, 1.01)  | 0.17                  | 0.98 (0.96, 1.01)  | 0.28                 |
|                                               | RT         |              |              | 0.95 (0.86, 1.03)  | 0.22                  | 0.93 (0.85, 1.02)  | 0.13                  | 0.94 (0.84, 1.05)  | 0.25                 |
| IGP68                                         | Continuous | 18.20 (3.46) | 17.82 (3.25) | 1.02 (0.99, 1.05)  | 0.12                  | 1.02 (0.99, 1.04)  | 0.27                  | 1.01 (0.98, 1.05)  | 0.44                 |
|                                               | RT         |              |              | 1.07 (0.98, 1.17)  | 0.13                  | 1.05 (0.95, 1.15)  | 0.34                  | 1.04 (0.93, 1.16)  | 0.50                 |
| IGP70                                         | Continuous | 0.22 (0.05)  | 0.21 (0.05)  | 4.33 (0.71, 26.41) | 0.11                  | 2.73 (0.41, 18.15) | 0.30                  | 2.05 (0.23, 18.63) | 0.52                 |
|                                               | RT         |              |              | 1.06 (0.97, 1.16)  | 0.19                  | 1.03 (0.94, 1.14)  | 0.49                  | 1.02 (0.92, 1.14)  | 0.68                 |
| IGP71                                         | Continuous | 17.88 (3.38) | 17.55 (3.07) | 1.02 (0.99, 1.05)  | 0.16                  | 1.01 (0.98, 1.04)  | 0.38                  | 1.01 (0.98, 1.04)  | 0.59                 |
|                                               | RT         |              |              | 1.06 (0.97, 1.16)  | 0.21                  | 1.03 (0.94, 1.14)  | 0.49                  | 1.02 (0.92, 1.14)  | 0.68                 |
| IGP72                                         | Continuous | 4.65 (1.09)  | 4.71 (1.01)  | 0.97 (0.89, 1.06)  | 0.51                  | 1.00 (0.91, 1.09)  | 0.93                  | 0.99 (0.89, 1.10)  | 0.85                 |
|                                               | RT         |              |              | 0.96 (0.87, 1.05)  | 0.32                  | 0.98 (0.89, 1.07)  | 0.64                  | 0.98 (0.88, 1.09)  | 0.74                 |

Supplementary Table 3 CRC-specific analysis

| Code                                                     | Glycan     | Dead<br>(N=385) | Survived<br>(N=844) | Crude model (n=1229) |                      | Model I (AJCC, age, sex,<br>n=1229) |                      | Model II (AJCC, age, sex,<br>time between sample and<br>surgery, operation type, CRP,<br>bmi, n=971) |         |
|----------------------------------------------------------|------------|-----------------|---------------------|----------------------|----------------------|-------------------------------------|----------------------|------------------------------------------------------------------------------------------------------|---------|
|                                                          |            | Mean (SD)       | Mean (SD)           | HR (95% CI)          | p-value              | HR (95% CI)                         | p-value              | HR (95% CI)                                                                                          | p-value |
| <b>Total IgG glycans (neutral and charged); Measured</b> |            |                 |                     |                      |                      |                                     |                      |                                                                                                      |         |
| IGP3                                                     | Continuous | 26.20 (7.31)    | 24.27 (6.59)        | 1.04 (1.02, 1.05)    | 5.9x10 <sup>-8</sup> | 1.04 (1.03, 1.06)                   | 2.2x10 <sup>-8</sup> | 1.03 (1.01, 1.05)                                                                                    | 0.001   |
|                                                          | RT         |                 |                     | 1.31 (1.18, 1.45)    | 2.8x10 <sup>-7</sup> | 1.33 (1.20, 1.48)                   | 5.5x10 <sup>-8</sup> | 1.23 (1.09, 1.40)                                                                                    | 0.001   |
| IGP5                                                     | Continuous | 6.23 (1.85)     | 5.91 (1.63)         | 1.10 (1.04, 1.17)    | 0.0004               | 1.12 (1.05, 1.18)                   | 0.0002               | 1.06 (0.99, 1.14)                                                                                    | 0.10    |
|                                                          | RT         |                 |                     | 1.18 (1.07, 1.31)    | 0.001                | 1.22 (1.09, 1.35)                   | 0.0003               | 1.10 (0.97, 1.25)                                                                                    | 0.14    |
| IGP7                                                     | Continuous | 18.33 (2.13)    | 18.59 (1.91)        | 0.94 (0.89, 0.99)    | 0.01                 | 0.94 (0.89, 0.99)                   | 0.01                 | 0.95 (0.89, 1.01)                                                                                    | 0.10    |
|                                                          | RT         |                 |                     | 0.89 (0.80, 0.99)    | 0.03                 | 0.89 (0.80, 0.98)                   | 0.02                 | 0.92 (0.81, 1.04)                                                                                    | 0.16    |
| IGP8                                                     | Continuous | 9.46 (1.35)     | 9.74 (1.38)         | 0.87 (0.81, 0.94)    | 0.003                | 0.90 (0.84, 0.97)                   | 0.006                | 0.92 (0.84, 1.00)                                                                                    | 0.05    |
|                                                          | RT         |                 |                     | 0.83 (0.75, 0.92)    | 0.0003               | 0.88 (0.79, 0.97)                   | 0.009                | 0.90 (0.80, 1.01)                                                                                    | 0.06    |
| IGP9                                                     | Continuous | 5.40 (1.19)     | 5.50 (1.18)         | 0.93 (0.85, 1.01)    | 0.10                 | 0.93 (0.85, 1.02)                   | 0.11                 | 0.92 (0.83, 1.03)                                                                                    | 0.15    |
|                                                          | RT         |                 |                     | 0.91 (0.82, 1.01)    | 0.08                 | 0.91 (0.82, 1.01)                   | 0.07                 | 0.90 (0.80, 1.02)                                                                                    | 0.11    |
| IGP13                                                    | Continuous | 10.30 (3.19)    | 11.24 (3.15)        | 0.91 (0.88, 0.94)    | 3.5x10 <sup>-8</sup> | 0.91 (0.88, 0.94)                   | 5.3x10 <sup>-8</sup> | 0.94 (0.90, 0.98)                                                                                    | 0.004   |
|                                                          | RT         |                 |                     | 0.73 (0.66, 0.81)    | 5.3x10 <sup>-9</sup> | 0.73 (0.66, 0.81)                   | 1.5x10 <sup>-8</sup> | 0.81 (0.71, 0.92)                                                                                    | 0.002   |
| IGP14                                                    | Continuous | 1.38 (0.40)     | 1.49 (0.43)         | 0.54 (0.42, 0.70)    | 2.9x10 <sup>-6</sup> | 0.56 (0.43, 0.72)                   | 1.2x10 <sup>-5</sup> | 0.70 (0.51, 0.96)                                                                                    | 0.03    |
|                                                          | RT         |                 |                     | 0.77 (0.70, 0.86)    | 9.7x10 <sup>-7</sup> | 0.79 (0.71, 0.87)                   | 5.7x10 <sup>-6</sup> | 0.86 (0.76, 0.98)                                                                                    | 0.02    |
| IGP17                                                    | Continuous | 7.87 (2.31)     | 8.35 (2.34)         | 0.91 (0.87, 0.96)    | 0.0001               | 0.90 (0.85, 0.94)                   | 5.2x10 <sup>-6</sup> | 0.92 (0.87, 0.97)                                                                                    | 0.003   |
|                                                          | RT         |                 |                     | 0.80 (0.72, 0.89)    | 2.4x10 <sup>-5</sup> | 0.77 (0.70, 0.86)                   | 1.4x10 <sup>-6</sup> | 0.82 (0.72, 0.93)                                                                                    | 0.002   |
| IGP18                                                    | Continuous | 1.87 (0.37)     | 1.90 (0.39)         | 0.85 (0.65, 1.10)    | 0.22                 | 0.78 (0.60, 1.02)                   | 0.07                 | 0.99 (0.74, 1.33)                                                                                    | 0.97    |
|                                                          | RT         |                 |                     | 0.94 (0.85, 1.04)    | 0.24                 | 0.92 (0.83, 1.01)                   | 0.08                 | 1.00 (0.90, 1.12)                                                                                    | 0.98    |
| <b>Sialylation; Derived</b>                              |            |                 |                     |                      |                      |                                     |                      |                                                                                                      |         |
| IGP24                                                    | Continuous | 24.84 (3.24)    | 24.90 (3.09)        | 0.99 (0.96, 1.02)    | 0.63                 | 0.97 (0.94, 1.00)                   | 0.06                 | 0.97 (0.93, 1.00)                                                                                    | 0.09    |
|                                                          | RT         |                 |                     | 0.97 (0.88, 1.07)    | 0.56                 | 0.91 (0.83, 1.01)                   | 0.07                 | 0.90 (0.80, 1.01)                                                                                    | 0.08    |
| IGP25                                                    | Continuous | 32.93 (6.13)    | 32.56 (6.34)        | 1.01 (0.99, 1.03)    | 0.27                 | 1.00 (0.99, 1.02)                   | 0.67                 | 1.01 (0.99, 1.03)                                                                                    | 0.37    |
|                                                          | RT         |                 |                     | 1.06 (0.96, 1.17)    | 0.26                 | 1.02 (0.92, 1.13)                   | 0.65                 | 1.05 (0.94, 1.19)                                                                                    | 0.38    |
| IGP26                                                    | Continuous | 16.47 (3.64)    | 17.17 (3.63)        | 0.95 (0.92, 0.98)    | 0.0003               | 0.94 (0.91, 0.96)                   | 7.4x10 <sup>-6</sup> | 0.95 (0.92, 0.98)                                                                                    | 0.002   |
|                                                          | RT         |                 |                     | 0.82 (0.74, 0.91)    | 0.0001               | 0.78 (0.71, 0.87)                   | 3.4x10 <sup>-6</sup> | 0.82 (0.72, 0.92)                                                                                    | 0.001   |

|                                     |            |              |              |                      |                      |                      |                      |                      |       |
|-------------------------------------|------------|--------------|--------------|----------------------|----------------------|----------------------|----------------------|----------------------|-------|
| IGP27                               | Continuous | 21.38 (4.93) | 21.66 (4.94) | 0.99 (0.97, 1.01)    | 0.29                 | 0.98 (0.96, 1.00)    | 0.08                 | 1.00 (0.97, 1.02)    | 0.79  |
|                                     | RT         |              |              | 0.95 (0.86, 1.05)    | 0.30                 | 0.92 (0.83, 1.01)    | 0.09                 | 0.99 (0.88, 1.11)    | 0.80  |
| IGP29                               | Continuous | 40.22 (3.05) | 39.57 (2.77) | 1.07 (1.04, 1.11)    | 4.0x10 <sup>-5</sup> | 1.02 (0.99, 1.06)    | 0.13                 | 0.99 (0.96, 1.03)    | 0.75  |
|                                     | RT         |              |              | 1.24 (1.12, 1.38)    | 3.7x10 <sup>-5</sup> | 1.10 (1.00, 1.22)    | 0.05                 | 1.00 (0.89, 1.13)    | 0.99  |
| IGP31                               | Continuous | 37.11 (3.80) | 36.44 (3.99) | 1.04 (1.01, 1.07)    | 0.002                | 1.04 (1.01, 1.06)    | 0.006                | 1.04 (1.01, 1.07)    | 0.01  |
|                                     | RT         |              |              | 1.18 (1.06, 1.30)    | 0.001                | 1.15 (1.05, 1.27)    | 0.004                | 1.17 (1.04, 1.31)    | 0.009 |
| <b>Bisecting GlcNAc; Derived</b>    |            |              |              |                      |                      |                      |                      |                      |       |
| IGP36                               | Continuous | 0.30 (0.07)  | 0.29 (0.08)  | 4.42 (1.23, 15.89)   | 0.02                 | 5.06 (1.30, 19.60)   | 0.02                 | 7.14 (1.41, 36.18)   | 0.02  |
|                                     | RT         |              |              | 1.13 (1.03, 1.25)    | 0.01                 | 1.14 (1.03, 1.27)    | 0.01                 | 1.17 (1.03, 1.33)    | 0.02  |
| IGP37                               | Continuous | 0.17 (0.05)  | 0.16 (0.05)  | 7.92 (1.06, 58.84)   | 0.04                 | 11.26 (1.42, 89.56)  | 0.02                 | 30.51 (2.53, 367.34) | 0.007 |
|                                     | RT         |              |              | 1.12 (1.01, 1.23)    | 0.03                 | 1.13 (1.02, 1.26)    | 0.02                 | 1.19 (1.05, 1.35)    | 0.006 |
| IGP38                               | Continuous | 0.14 (0.03)  | 0.14 (0.03)  | 24.79 (1.45, 423.15) | 0.03                 | 40.48 (2.19, 748.37) | 0.01                 | 138.34 (4.24, 4509)  | 0.006 |
|                                     | RT         |              |              | 1.12 (1.02, 1.24)    | 0.02                 | 1.14 (1.03, 1.27)    | 0.01                 | 1.19 (1.06, 1.35)    | 0.005 |
| IGP39                               | Continuous | 1.33 (0.32)  | 1.29 (0.30)  | 1.53 (1.12, 2.08)    | 0.008                | 1.42 (1.04, 1.94)    | 0.03                 | 1.35 (0.92, 1.98)    | 0.13  |
|                                     | RT         |              |              | 1.15 (1.04, 1.27)    | 0.006                | 1.13 (1.02, 1.25)    | 0.02                 | 1.10 (0.98, 1.25)    | 0.12  |
| IGP40                               | Continuous | 0.56 (0.06)  | 0.55 (0.06)  | 10.50 (1.78, 61.78)  | 0.009                | 7.90 (1.32, 47.39)   | 0.02                 | 4.87 (0.55, 43.15)   | 0.16  |
|                                     | RT         |              |              | 1.15 (1.04, 1.27)    | 0.008                | 1.13 (1.02, 1.25)    | 0.02                 | 1.10 (0.97, 1.25)    | 0.13  |
| <b>Neutral IgG glycans; Derived</b> |            |              |              |                      |                      |                      |                      |                      |       |
| IGP43                               | Continuous | 32.14 (8.00) | 29.98 (7.24) | 1.04 (1.02, 1.05)    | 3.5x10 <sup>-8</sup> | 1.02 (1.03, 1.05)    | 2.8x10 <sup>-8</sup> | 1.03 (1.01, 1.05)    | 0.001 |
|                                     | RT         |              |              | 1.32 (1.19, 1.46)    | 1.6x10 <sup>-7</sup> | 1.33 (1.20, 1.48)    | 6.4x10 <sup>-8</sup> | 1.24 (1.09, 1.41)    | 0.001 |
| IGP45                               | Continuous | 7.65 (2.07)  | 7.31 (1.83)  | 1.09 (1.04, 1.14)    | 0.0009               | 1.10 (1.04, 1.15)    | 0.001                | 1.04 (0.98, 1.11)    | 0.19  |
|                                     | RT         |              |              | 1.17 (1.06, 1.30)    | 0.002                | 1.19 (1.07, 1.33)    | 0.001                | 1.08 (0.94, 1.22)    | 0.27  |
| IGP47                               | Continuous | 22.71 (3.01) | 23.18 (2.66) | 0.94 (0.91, 0.98)    | 0.001                | 0.93 (0.90, 0.97)    | 0.0002               | 0.95 (0.91, 0.99)    | 0.02  |
|                                     | RT         |              |              | 0.85 (0.77, 0.95)    | 0.003                | 0.83 (0.75, 0.92)    | 0.0003               | 0.87 (0.77, 0.98)    | 0.02  |
| IGP48                               | Continuous | 11.72 (1.81) | 12.14 (1.79) | 0.89 (0.84, 0.94)    | 2.2x10 <sup>-5</sup> | 0.90 (0.85, 0.95)    | 0.0002               | 0.92 (0.86, 0.98)    | 0.01  |
|                                     | RT         |              |              | 0.80 (0.72, 0.89)    | 2.1x10 <sup>-5</sup> | 0.82 (0.74, 0.91)    | 0.0002               | 0.85 (0.76, 0.97)    | 0.01  |
| IGP49                               | Continuous | 6.68 (1.49)  | 6.85 (1.50)  | 0.92 (0.86, 0.99)    | 0.03                 | 0.91 (0.85, 0.98)    | 0.01                 | 0.92 (0.84, 1.00)    | 0.04  |
|                                     | RT         |              |              | 0.89 (0.80, 0.98)    | 0.02                 | 0.87 (0.78, 0.97)    | 0.009                | 0.88 (0.77, 0.99)    | 0.03  |
| IGP53                               | Continuous | 12.86 (4.38) | 14.11 (4.38) | 0.93 (0.91, 0.96)    | 1.1x10 <sup>-7</sup> | 0.93 (0.91, 0.96)    | 5.6x10 <sup>-8</sup> | 0.95 (0.93, 0.98)    | 0.003 |
|                                     | RT         |              |              | 0.74 (0.67, 0.82)    | 9.1x10 <sup>-9</sup> | 0.73 (0.66, 0.81)    | 9.7x10 <sup>-9</sup> | 0.80 (0.71, 0.92)    | 0.001 |
| IGP54                               | Continuous | 1.72 (0.53)  | 1.87 (0.59)  | 0.63 (0.52, 0.76)    | 2.4x10 <sup>-6</sup> | 0.63 (0.52, 0.77)    | 3.9x10 <sup>-6</sup> | 0.76 (0.60, 0.95)    | 0.02  |

|                                                        |            |              |              |                   |                       |                   |                      |                   |        |
|--------------------------------------------------------|------------|--------------|--------------|-------------------|-----------------------|-------------------|----------------------|-------------------|--------|
|                                                        | RT         |              |              | 0.77 (0.70, 0.86) | 8.5x10 <sup>-11</sup> | 0.78 (0.70, 0.86) | 2.0x10 <sup>-6</sup> | 0.85 (0.75, 0.97) | 0.01   |
| <b>Galactosylation; Derived</b>                        |            |              |              |                   |                       |                   |                      |                   |        |
| IGP55                                                  | Continuous | 40.83 (9.18) | 38.26 (8.36) | 1.03 (1.02, 1.04) | 1.7x10 <sup>-8</sup>  | 1.03 (1.02, 1.05) | 1.0x10 <sup>-8</sup> | 1.02 (1.01, 1.04) | 0.001  |
|                                                        | RT         |              |              | 1.33 (1.20, 1.47) | 7.0x10 <sup>-8</sup>  | 1.35 (1.22, 1.50) | 2.3x10 <sup>-8</sup> | 1.24 (1.09, 1.41) | 0.001  |
| IGP56                                                  | Continuous | 42.90 (4.63) | 43.99 (3.83) | 0.94 (0.92, 0.96) | 2.5x10 <sup>-7</sup>  | 0.94 (0.92, 0.96) | 1.1x10 <sup>-7</sup> | 0.95 (0.92, 0.98) | 0.0004 |
|                                                        | RT         |              |              | 0.80 (0.72, 0.88) | 1.5x10 <sup>-5</sup>  | 0.78 (0.70, 0.86) | 2.4x10 <sup>-6</sup> | 0.82 (0.72, 0.94) | 0.003  |
| IGP57                                                  | Continuous | 15.79 (5.09) | 17.30 (5.16) | 0.94 (0.92, 0.96) | 6.5x10 <sup>-8</sup>  | 0.94 (0.92, 0.96) | 6.1x10 <sup>-8</sup> | 0.96 (0.94, 0.99) | 0.005  |
|                                                        | RT         |              |              | 0.74 (0.66, 0.82) | 7.0x10 <sup>-9</sup>  | 0.73 (0.66, 0.82) | 1.2x10 <sup>-8</sup> | 0.81 (0.71, 0.93) | 0.002  |
| <b>Core fucosylation and bisecting GlcNAc; Derived</b> |            |              |              |                   |                       |                   |                      |                   |        |
| IGP62                                                  | Continuous | 79.68 (3.70) | 79.63 (3.52) | 1.00 (0.98, 1.03) | 0.79                  | 1.00 (0.97, 1.03) | 0.94                 | 1.00 (0.97, 1.04) | 0.88   |
|                                                        | RT         |              |              | 1.02 (0.92, 1.13) | 0.71                  | 1.01 (0.91, 1.13) | 0.80                 | 1.02 (0.90, 1.15) | 0.77   |
| IGP63                                                  | Continuous | 79.01 (4.23) | 78.62 (4.16) | 1.02 (1.00, 1.05) | 0.07                  | 1.02 (1.00, 1.05) | 0.10                 | 1.02 (0.99, 1.05) | 0.17   |
|                                                        | RT         |              |              | 1.10 (1.00, 1.22) | 0.06                  | 1.10 (0.99, 1.22) | 0.07                 | 1.10 (0.97, 1.24) | 0.13   |
| IGP64                                                  | Continuous | 80.24 (3.73) | 80.30 (3.62) | 1.00 (0.97, 1.02) | 0.84                  | 1.00 (0.97, 1.02) | 0.75                 | 1.00 (0.96, 1.03) | 0.94   |
|                                                        | RT         |              |              | 0.99 (0.90, 1.10) | 0.92                  | 0.99 (0.89, 1.11) | 0.90                 | 1.00 (0.89, 1.14) | 0.94   |
| IGP66                                                  | Continuous | 17.10 (3.15) | 17.09 (2.97) | 1.00 (0.97, 1.03) | 0.99                  | 1.00 (0.96, 1.03) | 0.95                 | 0.99 (0.95, 1.03) | 0.51   |
|                                                        | RT         |              |              | 0.99 (0.90, 1.10) | 0.89                  | 0.99 (0.89, 1.10) | 0.80                 | 0.95 (0.84, 1.08) | 0.44   |
| IGP67                                                  | Continuous | 18.98 (3.81) | 19.36 (3.70) | 0.97 (0.95, 1.00) | 0.06                  | 0.97 (0.95, 1.00) | 0.06                 | 0.97 (0.94, 1.00) | 0.08   |
|                                                        | RT         |              |              | 0.90 (0.82, 1.00) | 0.05                  | 0.90 (0.81, 1.00) | 0.04                 | 0.89 (0.79, 1.01) | 0.07   |
| IGP68                                                  | Continuous | 18.01 (3.39) | 17.96 (3.32) | 1.00 (0.97, 1.03) | 0.87                  | 1.00 (0.97, 1.03) | 0.93                 | 0.99 (0.96, 1.03) | 0.73   |
|                                                        | RT         |              |              | 1.00 (0.91, 1.11) | 0.94                  | 1.00 (0.90, 1.11) | 0.93                 | 0.97 (0.86, 1.10) | 0.64   |
| IGP70                                                  | Continuous | 0.21 (0.05)  | 0.21 (0.05)  | 1.08 (0.13, 8.62) | 0.94                  | 1.06 (0.12, 9.53) | 0.30                 | 0.50 (0.04, 6.76) | 0.60   |
|                                                        | RT         |              |              | 0.99 (0.90, 1.10) | 0.87                  | 0.99 (0.89, 1.10) | 0.79                 | 0.95 (0.84, 1.08) | 0.47   |
| IGP71                                                  | Continuous | 17.68 (3.33) | 17.68 (3.14) | 1.00 (0.97, 1.03) | 0.96                  | 1.00 (0.97, 1.03) | 0.96                 | 0.99 (0.95, 1.03) | 0.58   |
|                                                        | RT         |              |              | 0.99 (0.89, 1.10) | 0.85                  | 0.99 (0.89, 1.10) | 0.80                 | 0.96 (0.85, 1.09) | 0.50   |
| IGP72                                                  | Continuous | 4.71 (1.06)  | 4.68 (1.03)  | 1.03 (0.93, 1.13) | 0.61                  | 1.03 (0.93, 1.14) | 0.54                 | 1.05 (0.93, 1.18) | 0.42   |
|                                                        | RT         |              |              | 1.02 (0.92, 1.13) | 0.68                  | 1.02 (0.92, 1.14) | 0.67                 | 1.05 (0.92, 1.18) | 0.47   |

Supplementary Table 4 All-cause mortality analysis for stages 1-3

| Code                                                     | Glycan     | Dead (N=355) | Survived (N=728) | Crude model (n=1083) |                      | Model I (AJCC, age, sex, n=1083) |                       | Model II (AJCC, age, sex, time between sample and surgery, operation type, bmi, CRP n=850) |                      |
|----------------------------------------------------------|------------|--------------|------------------|----------------------|----------------------|----------------------------------|-----------------------|--------------------------------------------------------------------------------------------|----------------------|
|                                                          |            | Mean (SD)    | Mean (SD)        | HR (95% CI)          | p-value              | HR (95% CI)                      | p-value               | HR (95% CI)                                                                                | p-value              |
| <b>Total IgG glycans (neutral and charged); Measured</b> |            |              |                  |                      |                      |                                  |                       |                                                                                            |                      |
| IGP3                                                     | Continuous | 26.11 (7.30) | 23.90 (6.34)     | 1.04 (1.03, 1.06)    | 9.5x10 <sup>-8</sup> | 1.04 (1.02, 1.05)                | 1.6x10 <sup>-6</sup>  | 1.04 (1.02, 1.06)                                                                          | 9.6x10 <sup>-5</sup> |
|                                                          | RT         |              |                  | 1.32 (1.18, 1.47)    | 4.4x10 <sup>-7</sup> | 1.29 (1.16, 1.45)                | 8.13x10 <sup>-6</sup> | 1.28 (1.11, 1.46)                                                                          | 0.0004               |
| IGP5                                                     | Continuous | 6.43 (1.86)  | 5.80 (1.86)      | 1.18 (1.12, 1.25)    | 3.3x10 <sup>-9</sup> | 1.16 (1.10, 1.24)                | 7.6x10 <sup>-7</sup>  | 1.16 (1.08, 1.25)                                                                          | 3.8x10 <sup>-5</sup> |
|                                                          | RT         |              |                  | 1.35 (1.22, 1.51)    | 3.0x10 <sup>-8</sup> | 1.30 (1.16, 1.47)                | 7.2x10 <sup>-6</sup>  | 1.30 (1.13, 1.49)                                                                          | 0.0002               |
| IGP7                                                     | Continuous | 18.25 (2.18) | 18.66 (1.80)     | 0.91 (0.86, 0.96)    | 0.001                | 0.92 (0.87, 0.98)                | 0.006                 | 0.91 (0.85, 0.97)                                                                          | 0.002                |
|                                                          | RT         |              |                  | 0.84 (0.75, 0.93)    | 0.001                | 0.87 (0.78, 0.97)                | 0.01                  | 0.84 (0.74, 0.96)                                                                          | 0.008                |
| IGP8                                                     | Continuous | 9.35 (1.39)  | 9.84 (1.34)      | 0.81 (0.75, 0.87)    | 5.9x10 <sup>-8</sup> | 0.81 (0.75, 0.88)                | 2.1x10 <sup>-7</sup>  | 0.80 (0.73, 0.87)                                                                          | 7.9x10 <sup>-7</sup> |
|                                                          | RT         |              |                  | 0.75 (0.67, 0.83)    | 6.9x10 <sup>-8</sup> | 0.75 (0.68, 0.84)                | 2.8x10 <sup>-7</sup>  | 0.73 (0.65, 0.83)                                                                          | 1.0x10 <sup>-6</sup> |
| IGP9                                                     | Continuous | 5.57 (1.27)  | 5.48 (1.16)      | 1.05 (0.96, 1.14)    | 0.32                 | 1.02 (0.93, 1.12)                | 0.65                  | 1.00 (0.91, 1.11)                                                                          | 0.94                 |
|                                                          | RT         |              |                  | 1.04 (0.94, 1.16)    | 0.44                 | 1.01 (0.91, 1.13)                | 0.81                  | 1.00 (0.88, 1.13)                                                                          | 0.95                 |
| IGP13                                                    | Continuous | 10.29 (3.07) | 11.42 (3.11)     | 0.90 (0.87, 0.93)    | 8.1x10 <sup>-9</sup> | 0.91 (0.87, 0.94)                | 7.9x10 <sup>-7</sup>  | 0.92 (0.88, 0.96)                                                                          | 0.0003               |
|                                                          | RT         |              |                  | 0.71 (0.64, 0.80)    | 1.6x10 <sup>-9</sup> | 0.73 (0.65, 0.82)                | 1.6x10 <sup>-7</sup>  | 0.75 (0.65, 0.87)                                                                          | 7.5x10 <sup>-5</sup> |
| IGP14                                                    | Continuous | 1.41 (0.41)  | 1.50 (0.43)      | 0.64 (0.49, 0.83)    | 0.001                | 0.67 (0.51, 0.87)                | 0.003                 | 0.73 (0.53, 1.00)                                                                          | 0.05                 |
|                                                          | RT         |              |                  | 0.83 (0.74, 0.92)    | 0.0004               | 0.84 (0.75, 0.94)                | 0.002                 | 0.87 (0.76, 0.99)                                                                          | 0.03                 |
| IGP17                                                    | Continuous | 7.83 (2.30)  | 8.45 (2.28)      | 0.90 (0.86, 0.94)    | 2.6x10 <sup>-5</sup> | 0.91 (0.86, 0.96)                | 0.0005                | 0.92 (0.87, 0.99)                                                                          | 0.02                 |
|                                                          | RT         |              |                  | 0.77 (0.70, 0.86)    | 3.2x10 <sup>-6</sup> | 0.79 (0.70, 0.89)                | 5.7x10 <sup>-5</sup>  | 0.81 (0.71, 0.93)                                                                          | 0.003                |
| IGP18                                                    | Continuous | 1.88 (0.39)  | 1.90 (0.39)      | 0.89 (0.67, 1.16)    | 0.38                 | 0.87 (0.67, 1.13)                | 0.31                  | 0.89 (0.66, 1.20)                                                                          | 0.43                 |
|                                                          | RT         |              |                  | 0.95 (0.86, 1.05)    | 0.33                 | 0.95 (0.86, 1.05)                | 0.33                  | 0.95 (0.85, 1.07)                                                                          | 0.40                 |
| <b>Sialylation</b>                                       |            |              |                  |                      |                      |                                  |                       |                                                                                            |                      |
| IGP24                                                    | Continuous | 24.78 (3.18) | 24.93 (3.04)     | 0.99 (0.95, 1.02)    | 0.49                 | 0.99 (0.96, 1.03)                | 0.58                  | 1.00 (0.96, 1.04)                                                                          | 0.88                 |
|                                                          | RT         |              |                  | 0.96 (0.86, 1.06)    | 0.40                 | 0.96 (0.86, 1.07)                | 0.48                  | 1.00 (0.88, 1.13)                                                                          | 0.99                 |
| IGP25                                                    | Continuous | 32.49 (6.30) | 32.58 (6.38)     | 1.00 (0.98, 1.02)    | 0.91                 | 1.00 (0.98, 1.02)                | 0.94                  | 1.00 (0.98, 1.02)                                                                          | 0.90                 |
|                                                          | RT         |              |                  | 0.99 (0.90, 1.10)    | 0.91                 | 1.00 (0.90, 1.10)                | 0.96                  | 1.01 (0.90, 1.13)                                                                          | 0.89                 |
| IGP26                                                    | Continuous | 16.43 (3.64) | 17.32 (3.55)     | 0.94 (0.91, 0.97)    | 0.0001               | 0.95 (0.92, 0.98)                | 0.001                 | 0.95 (0.92, 0.99)                                                                          | 0.02                 |
|                                                          | RT         |              |                  | 0.80 (0.72, 0.89)    | 4.0x10 <sup>-5</sup> | 0.81 (0.73, 0.91)                | 0.0002                | 0.83 (0.73, 0.95)                                                                          | 0.007                |

|                            |            |              |              |                     |                       |                     |                      |                      |                      |
|----------------------------|------------|--------------|--------------|---------------------|-----------------------|---------------------|----------------------|----------------------|----------------------|
| IGP27                      | Continuous | 21.01 (5.01) | 21.81 (4.97) | 0.97 (0.95, 1.00)   | 0.02                  | 0.98 (0.96, 1.00)   | 0.05                 | 0.98 (0.96, 1.01)    | 0.14                 |
|                            | RT         |              |              | 0.87 (0.79, 0.97)   | 0.01                  | 0.90 (0.81, 1.00)   | 0.05                 | 0.91 (0.81, 1.02)    | 0.12                 |
| IGP29                      | Continuous | 40.09 (2.90) | 39.49 (2.70) | 1.07 (1.03, 1.11)   | 0.0001                | 1.06 (1.02, 1.10)   | 0.001                | 1.06 (1.01, 1.10)    | 0.009                |
|                            | RT         |              |              | 1.23 (1.10, 1.37)   | 0.0002                | 1.20 (1.07, 1.34)   | 0.001                | 1.19 (1.05, 1.35)    | 0.007                |
| IGP31                      | Continuous | 36.78 (3.86) | 36.40 (3.97) | 1.02 (1.00, 1.05)   | 0.10                  | 1.02 (0.99, 1.05)   | 0.12                 | 1.01 (0.98, 1.04)    | 0.58                 |
|                            | RT         |              |              | 1.10 (0.99, 1.21)   | 0.08                  | 1.09 (0.98, 1.21)   | 0.10                 | 1.04 (0.92, 1.17)    | 0.53                 |
| <b>Bisecting GlcNAc</b>    |            |              |              |                     |                       |                     |                      |                      |                      |
| IGP36                      | Continuous | 0.30 (0.08)  | 0.28 (0.07)  | 10.21 (2.80, 37.30) | 0.0004                | 7.18 (1.82, 28.32)  | 0.005                | 7.26 (1.42, 37.22)   | 0.02                 |
|                            | RT         |              |              | 1.20 (1.09, 1.34)   | 0.0004                | 1.17 (1.05, 1.30)   | 0.006                | 1.16 (1.02, 1.32)    | 0.02                 |
| IGP37                      | Continuous | 0.17 (0.05)  | 0.16 (0.05)  | 20.26 (2.63, 155.9) | 0.004                 | 13.32 (1.57, 112.9) | 0.02                 | 11.89 (0.94, 150.5)  | 0.06                 |
|                            | RT         |              |              | 1.16 (1.05, 1.29)   | 0.005                 | 1.13 (1.02, 1.26)   | 0.02                 | 1.12 (0.99, 1.28)    | 0.08                 |
| IGP38                      | Continuous | 0.14 (0.04)  | 0.14 (0.03)  | 84.20 (4.58, 1549)  | 0.003                 | 43.03 (2.04, 909.9) | 0.02                 | 33.95 (0.92, 12.46)  | 0.06                 |
|                            | RT         |              |              | 1.17 (1.05, 1.30)   | 0.003                 | 1.14 (1.02, 1.27)   | 0.02                 | 1.13 (0.99, 1.28)    | 0.07                 |
| IGP39                      | Continuous | 1.36 (0.33)  | 1.27 (0.30)  | 2.04 (1.49, 2.81)   | 1.0x10 <sup>-5</sup>  | 1.86 (1.34, 2.58)   | 0.0002               | 1.84 (1.24, 2.73)    | 0.002                |
|                            | RT         |              |              | 1.26 (1.13, 1.40)   | 2.0x10 <sup>-5</sup>  | 1.22 (1.10, 1.36)   | 0.0003               | 1.21 (1.06, 1.37)    | 0.005                |
| IGP40                      | Continuous | 0.56 (0.06)  | 0.55 (0.06)  | 55.05 (8.57, 353.6) | 2.4x10 <sup>-5</sup>  | 32.58 (4.82, 220.4) | 0.0004               | 24.66 (2.52, 241.26) | 0.006                |
|                            | RT         |              |              | 1.26 (1.13, 1.40)   | 2.2x10 <sup>-5</sup>  | 1.22 (1.09, 1.36)   | 0.0003               | 1.20 (1.06, 1.37)    | 0.005                |
| <b>Neutral IgG glycans</b> |            |              |              |                     |                       |                     |                      |                      |                      |
| IGP43                      | Continuous | 31.97 (7.93) | 29.59 (6.98) | 1.04 (1.02, 1.05)   | 1.3x10 <sup>-7</sup>  | 1.04 (1.02, 1.05)   | 2.4x10 <sup>-6</sup> | 1.03 (1.02, 1.05)    | 0.0001               |
|                            | RT         |              |              | 1.32 (1.18, 1.47)   | 5.3x10 <sup>-7</sup>  | 1.29 (1.15, 1.45)   | 1.0x10 <sup>-5</sup> | 1.28 (1.12, 1.47)    | 0.0004               |
| IGP45                      | Continuous | 7.88 (2.08)  | 7.18 (1.75)  | 1.16 (1.10, 1.22)   | 5.4x10 <sup>-9</sup>  | 1.14 (1.08, 1.21)   | 1.6x10 <sup>-6</sup> | 1.14 (1.07, 1.22)    | 5.8x10 <sup>-5</sup> |
|                            | RT         |              |              | 1.35 (1.21, 1.50)   | 4.8x10 <sup>-8</sup>  | 1.29 (1.15, 1.45)   | 1.5x10 <sup>-5</sup> | 1.29 (1.12, 1.48)    | 0.0003               |
| IGP47                      | Continuous | 22.58 (3.07) | 23.30 (2.50) | 0.92 (0.88, 0.95)   | 1.3x10 <sup>-5</sup>  | 0.93 (0.89, 0.97)   | 0.0004               | 0.92 (0.88, 0.97)    | 0.0004               |
|                            | RT         |              |              | 0.79 (0.71, 0.89)   | 3.8x10 <sup>-5</sup>  | 0.82 (0.73, 0.92)   | 0.001                | 0.81 (0.71, 0.92)    | 0.002                |
| IGP48                      | Continuous | 11.56 (1.84) | 12.29 (1.74) | 0.83 (0.78, 0.88)   | 8.8x10 <sup>-10</sup> | 0.84 (0.79, 0.89)   | 6.5x10 <sup>-9</sup> | 0.83 (0.77, 0.89)    | 1.1x10 <sup>-7</sup> |
|                            | RT         |              |              | 0.72 (0.64, 0.80)   | 8.0x10 <sup>-10</sup> | 0.72 (0.65, 0.81)   | 7.0x10 <sup>-9</sup> | 0.71 (0.63, 0.81)    | 1.2x10 <sup>-7</sup> |
| IGP49                      | Continuous | 6.88 (1.60)  | 6.84 (1.47)  | 1.01 (0.94, 1.08)   | 0.80                  | 0.99 (0.93, 1.07)   | 0.88                 | 0.99 (0.91, 1.07)    | 0.73                 |
|                            | RT         |              |              | 1.00 (0.90, 1.12)   | 0.95                  | 0.98 (0.88, 1.09)   | 0.72                 | 0.97 (0.86, 1.10)    | 0.63                 |
| IGP53                      | Continuous | 12.82 (4.23) | 14.36 (4.34) | 0.93 (0.90, 0.95)   | 2.0x10 <sup>-8</sup>  | 0.93 (0.91, 0.96)   | 1.5x10 <sup>-6</sup> | 0.94 (0.91, 0.97)    | 0.001                |
|                            | RT         |              |              | 0.72 (0.64, 0.80)   | 1.8x10 <sup>-9</sup>  | 0.73 (0.65, 0.82)   | 1.5x10 <sup>-7</sup> | 0.75 (0.65, 0.87)    | 7.8x10 <sup>-5</sup> |
| IGP54                      | Continuous | 1.76 (0.55)  | 1.88 (0.59)  | 0.70 (0.58, 0.85)   | 0.0004                | 0.73 (0.60, 0.89)   | 0.002                | 0.78 (0.62, 0.99)    | 0.04                 |
|                            | RT         |              |              | 0.82 (0.73, 0.91)   | 0.0002                | 0.83 (0.75, 0.93)   | 0.001                | 0.86 (0.76, 0.98)    | 0.02                 |

| <b>Galactosylation</b>                        |            |              |              |                     |                      |                     |                      |                     |                      |
|-----------------------------------------------|------------|--------------|--------------|---------------------|----------------------|---------------------|----------------------|---------------------|----------------------|
| IGP55                                         | Continuous | 40.89 (9.04) | 37.72 (8.04) | 1.04 (1.03, 1.05)   | 1.7x10 <sup>-9</sup> | 1.04 (1.02, 1.05)   | 7.1x10 <sup>-8</sup> | 1.04 (1.02, 1.05)   | 8.4x10 <sup>-6</sup> |
|                                               | RT         |              |              | 1.38 (1.24, 1.54)   | 6.7x10 <sup>-9</sup> | 1.35 (1.21, 1.52)   | 2.9x10 <sup>-7</sup> | 1.34 (1.17, 1.54)   | 2.9x10 <sup>-5</sup> |
| IGP56                                         | Continuous | 42.83 (4.68) | 42.25 (3.54) | 0.93 (0.91, 0.96)   | 6.5x10 <sup>-9</sup> | 0.94 (0.91, 0.96)   | 6.9x10 <sup>-8</sup> | 0.93 (0.90, 0.96)   | 3.3x10 <sup>-7</sup> |
|                                               | RT         |              |              | 0.76 (0.68, 0.85)   | 9.3x10 <sup>-7</sup> | 0.77 (0.69, 0.87)   | 1.0x10 <sup>-5</sup> | 0.75 (0.65, 0.86)   | 2.6x10 <sup>-5</sup> |
| IGP57                                         | Continuous | 15.81 (4.93) | 17.58 (5.12) | 0.94 (0.92, 0.96)   | 4.1x10 <sup>-8</sup> | 0.94 (0.92, 0.97)   | 2.5x10 <sup>-6</sup> | 0.95 (0.93, 0.98)   | 0.001                |
|                                               | RT         |              |              | 0.72 (0.65, 0.81)   | 5.4x10 <sup>-9</sup> | 0.74 (0.66, 0.83)   | 3.6x10 <sup>-7</sup> | 0.76 (0.66, 0.88)   | 0.0002               |
| <b>Core fucosylation and bisecting GlcNAc</b> |            |              |              |                     |                      |                     |                      |                     |                      |
| IGP62                                         | Continuous | 79.17 (3.89) | 79.77 (3.47) | 0.97 (0.94, 0.99)   | 0.02                 | 0.98 (0.95, 1.01)   | 0.11                 | 0.97 (0.94, 1.01)   | 0.12                 |
|                                               | RT         |              |              | 0.89 (0.80, 0.99)   | 0.03                 | 0.92 (0.83, 1.03)   | 0.15                 | 0.91 (0.81, 1.03)   | 0.15                 |
| IGP63                                         | Continuous | 78.42 (4.42) | 78.69 (4.14) | 0.99 (0.97, 1.01)   | 0.41                 | 1.00 (0.97, 1.02)   | 0.74                 | 0.99 (0.96, 1.02)   | 0.54                 |
|                                               | RT         |              |              | 0.96 (0.86, 1.07)   | 0.46                 | 0.99 (0.89, 1.10)   | 0.81                 | 0.96 (0.85, 1.09)   | 0.57                 |
| IGP64                                         | Continuous | 79.71 (3.94) | 80.45 (3.57) | 0.96 (0.93, 0.99)   | 0.003                | 0.97 (0.94, 1.00)   | 0.03                 | 0.97 (0.94, 1.00)   | 0.04                 |
|                                               | RT         |              |              | 0.86 (0.77, 0.96)   | 0.005                | 0.89 (0.80, 0.99)   | 0.04                 | 0.88 (0.78, 1.00)   | 0.05                 |
| IGP66                                         | Continuous | 17.58 (3.31) | 16.97 (2.91) | 1.05 (1.02, 1.09)   | 0.002                | 1.04 (1.00, 1.07)   | 0.04                 | 1.04 (1.00, 1.08)   | 0.08                 |
|                                               | RT         |              |              | 1.16 (1.05, 1.29)   | 0.005                | 1.11 (1.00, 1.24)   | 0.06                 | 1.11 (0.98, 1.26)   | 0.10                 |
| IGP67                                         | Continuous | 19.52 (3.98) | 19.29 (3.67) | 1.01 (0.98, 1.04)   | 0.44                 | 1.00 (0.98, 1.03)   | 0.83                 | 1.01 (0.97, 1.04)   | 0.67                 |
|                                               | RT         |              |              | 1.04 (0.93, 1.15)   | 0.51                 | 1.00 (0.90, 1.12)   | 0.93                 | 1.02 (0.90, 1.16)   | 0.71                 |
| IGP68                                         | Continuous | 18.52 (3.59) | 17.82 (3.27) | 1.05 (1.02, 1.08)   | 0.002                | 1.04 (1.01, 1.07)   | 0.02                 | 1.04 (1.00, 1.08)   | 0.04                 |
|                                               | RT         |              |              | 1.17 (1.05, 1.30)   | 0.003                | 1.13 (1.01, 1.25)   | 0.03                 | 1.13 (1.00, 1.28)   | 0.05                 |
| IGP70                                         | Continuous | 0.22 (0.05)  | 0.21 (0.05)  | 27.42 (3.53, 213.1) | 0.002                | 10.93 (1.32, 90.70) | 0.03                 | 10.14 (0.88, 116.8) | 0.06                 |
|                                               | RT         |              |              | 1.16 (1.05, 1.29)   | 0.005                | 1.11 (0.99, 1.24)   | 0.06                 | 1.11 (0.98, 1.26)   | 0.10                 |
| IGP71                                         | Continuous | 18.18 (3.50) | 17.55 (3.08) | 1.05 (1.02, 1.08)   | 0.003                | 1.03 (1.00, 1.07)   | 0.04                 | 1.03 (1.00, 1.07)   | 0.08                 |
|                                               | RT         |              |              | 1.16 (1.04, 1.29)   | 0.006                | 1.10 (0.99, 1.23)   | 0.07                 | 1.11 (0.98, 1.26)   | 0.11                 |
| IGP72                                         | Continuous | 4.57 (1.10)  | 4.72 (1.01)  | 0.90 (0.81, 1.00)   | 0.04                 | 0.94 (0.84, 1.05)   | 0.25                 | 0.92 (0.81, 1.04)   | 0.19                 |
|                                               | RT         |              |              | 0.88 (0.79, 0.97)   | 0.01                 | 0.92 (0.82, 1.02)   | 0.12                 | 0.91 (0.80, 1.03)   | 0.15                 |



Supplementary Table 5 CRC-specific mortality analysis for stages 1-3

| Code                                                     | Glycan     | Dead (N=257) | Survived (N=826) | Crude model (n=1083) |                      | Model I (AJCC, age, sex, n=1083) |                      | Model II (AJCC, age, sex, time between sample and surgery, operation type, bmi, CRP n=850) |         |
|----------------------------------------------------------|------------|--------------|------------------|----------------------|----------------------|----------------------------------|----------------------|--------------------------------------------------------------------------------------------|---------|
|                                                          |            | Mean (SD)    | Mean (SD)        | HR (95% CI)          | p-value              | HR (95% CI)                      | p-value              | HR (95% CI)                                                                                | p-value |
| <b>Total IgG glycans (neutral and charged); Measured</b> |            |              |                  |                      |                      |                                  |                      |                                                                                            |         |
| IGP3                                                     | Continuous | 25.76 (7.28) | 24.27 (6.53)     | 1.03 (1.01, 1.05)    | 0.0004               | 1.04 (1.02, 1.05)                | 0.0001               | 1.03 (1.01, 1.06)                                                                          | 0.004   |
|                                                          | RT         |              |                  | 1.24 (1.10, 1.40)    | 0.001                | 1.28 (1.12, 1.46)                | 0.002                | 1.24 (1.05, 1.45)                                                                          | 0.01    |
| IGP5                                                     | Continuous | 6.29 (1.85)  | 5.91 (1.63)      | 1.13 (1.05, 1.21)    | 0.005                | 1.13 (1.05, 1.22)                | 0.001                | 1.10 (1.01, 1.20)                                                                          | 0.04    |
|                                                          | RT         |              |                  | 1.23 (1.09, 1.40)    | 0.001                | 1.23 (1.08, 1.42)                | 0.002                | 1.17 (0.99, 1.37)                                                                          | 0.06    |
| IGP7                                                     | Continuous | 18.33 (2.09) | 18.59 (1.90)     | 0.93 (0.88, 1.00)    | 0.04                 | 0.94 (0.88, 1.00)                | 0.05                 | 0.93 (0.86, 1.00)                                                                          | 0.07    |
|                                                          | RT         |              |                  | 0.89 (0.78, 1.01)    | 0.07                 | 0.89 (0.78, 1.02)                | 0.09                 | 0.88 (0.76, 1.03)                                                                          | 0.11    |
| IGP8                                                     | Continuous | 9.46 (1.38)  | 9.75 (1.37)      | 0.86 (0.79, 0.94)    | 0.001                | 0.86 (0.79, 0.95)                | 0.002                | 0.84 (0.75, 0.93)                                                                          | 0.001   |
|                                                          | RT         |              |                  | 0.82 (0.72, 0.92)    | 0.001                | 0.82 (0.73, 0.93)                | 0.002                | 0.79 (0.68, 0.91)                                                                          | 0.001   |
| IGP9                                                     | Continuous | 5.54 (1.25)  | 5.50 (1.18)      | 1.02 (0.92, 1.13)    | 0.67                 | 0.99 (0.89, 1.10)                | 0.83                 | 0.97 (0.85, 1.10)                                                                          | 0.59    |
|                                                          | RT         |              |                  | 1.02 (0.90, 1.15)    | 0.77                 | 0.98 (0.86, 1.11)                | 0.73                 | 0.95 (0.82, 1.10)                                                                          | 0.52    |
| IGP13                                                    | Continuous | 10.48 (3.14) | 11.23 (3.13)     | 0.92 (0.89, 0.96)    | 0.0001               | 0.91 (0.87, 0.96)                | 8.3x10 <sup>-5</sup> | 0.93 (0.88, 0.99)                                                                          | 0.02    |
|                                                          | RT         |              |                  | 0.77 (0.68, 0.87)    | 6.0x10 <sup>-5</sup> | 0.74 (0.65, 0.85)                | 3.1x10 <sup>-5</sup> | 0.79 (0.67, 0.93)                                                                          | 0.006   |
| IGP14                                                    | Continuous | 1.41 (0.41)  | 1.49 (0.43)      | 0.66 (0.48, 0.89)    | 0.007                | 0.64 (0.47, 0.87)                | 0.004                | 0.73 (0.50, 1.06)                                                                          | 0.10    |
|                                                          | RT         |              |                  | 0.84 (0.74, 0.95)    | 0.005                | 0.83 (0.73, 0.94)                | 0.003                | 0.87 (0.75, 1.01)                                                                          | 0.07    |
| IGP17                                                    | Continuous | 7.99 (2.33)  | 8.33 (2.29)      | 0.93 (0.88, 0.99)    | 0.02                 | 0.92 (0.87, 0.98)                | 0.007                | 0.95 (0.88, 1.02)                                                                          | 0.16    |
|                                                          | RT         |              |                  | 0.84 (0.74, 0.95)    | 0.007                | 0.81 (0.71, 0.93)                | 0.003                | 0.86 (0.73, 1.01)                                                                          | 0.07    |
| IGP18                                                    | Continuous | 1.88 (0.38)  | 1.89 (0.39)      | 0.89 (0.65, 1.23)    | 0.49                 | 0.86 (0.63, 1.17)                | 0.34                 | 0.94 (0.66, 1.33)                                                                          | 0.71    |
|                                                          | RT         |              |                  | 0.96 (0.85, 1.08)    | 0.47                 | 0.95 (0.85, 1.07)                | 0.40                 | 0.97 (0.85, 1.11)                                                                          | 0.69    |
| <b>Sialylation</b>                                       |            |              |                  |                      |                      |                                  |                      |                                                                                            |         |
| IGP24                                                    | Continuous | 24.87 (3.25) | 24.88 (3.03)     | 1.00 (0.96, 1.04)    | 0.93                 | 0.99 (0.95, 1.03)                | 0.66                 | 1.00 (0.96, 1.05)                                                                          | 0.85    |
|                                                          | RT         |              |                  | 0.98 (0.87, 1.12)    | 0.81                 | 0.96 (0.85, 1.09)                | 0.56                 | 1.00 (0.86, 1.16)                                                                          | 0.99    |
| IGP25                                                    | Continuous | 32.52 (6.35) | 32.56 (6.35)     | 1.00 (0.98, 1.02)    | 0.98                 | 1.00 (0.98, 1.02)                | 0.91                 | 1.01 (0.98, 1.03)                                                                          | 0.62    |
|                                                          | RT         |              |                  | 1.00 (0.89, 1.13)    | 0.99                 | 1.01 (0.90, 1.13)                | 0.90                 | 1.04 (0.90, 1.19)                                                                          | 0.62    |
| IGP26                                                    | Continuous | 16.64 (3.67) | 17.15 (3.58)     | 0.96 (0.93, 0.99)    | 0.02                 | 0.95 (0.92, 0.99)                | 0.007                | 0.96 (0.92, 1.01)                                                                          | 0.11    |
|                                                          | RT         |              |                  | 0.85 (0.75, 0.97)    | 0.01                 | 0.83 (0.73, 0.94)                | 0.004                | 0.86 (0.74, 1.01)                                                                          | 0.06    |

|                            |            |              |              |                     |                      |                     |                      |                    |        |
|----------------------------|------------|--------------|--------------|---------------------|----------------------|---------------------|----------------------|--------------------|--------|
| IGP27                      | Continuous | 21.19 (5.12) | 21.66 (4.95) | 0.98 (0.96, 1.01)   | 0.17                 | 0.98 (0.96, 1.01)   | 0.20                 | 0.99 (0.96, 1.02)  | 0.63   |
|                            | RT         |              |              | 0.91 (0.81, 1.03)   | 0.14                 | 0.92 (0.82, 1.04)   | 0.20                 | 0.96 (0.84, 1.11)  | 0.59   |
| IGP29                      | Continuous | 40.13 (2.97) | 39.55 (2.71) | 1.08 (1.03, 1.12)   | 0.001                | 1.06 (1.02, 1.10)   | 0.008                | 1.05 (1.00, 1.10)  | 0.05   |
|                            | RT         |              |              | 1.24 (1.09, 1.41)   | 0.001                | 1.19 (1.05, 1.36)   | 0.007                | 1.17 (1.01, 1.36)  | 0.04   |
| IGP31                      | Continuous | 36.84 (3.79) | 36.43 (3.97) | 1.03 (1.00, 1.06)   | 0.10                 | 1.03 (1.00, 1.06)   | 0.06                 | 1.02 (0.98, 1.05)  | 0.32   |
|                            | RT         |              |              | 1.11 (0.98, 1.26)   | 0.09                 | 1.13 (1.00, 1.27)   | 0.05                 | 1.08 (0.94, 1.24)  | 0.28   |
| <b>Bisecting GlcNAc</b>    |            |              |              |                     |                      |                     |                      |                    |        |
| IGP36                      | Continuous | 0.29 (0.07)  | 0.29 (0.08)  | 4.00 (0.84, 19.03)  | 0.08                 | 3.86 (0.75, 19.74)  | 0.11                 | 4.17 (0.58, 29.87) | 0.16   |
|                            | RT         |              |              | 1.12 (0.99, 1.27)   | 0.06                 | 1.12 (0.99, 1.27)   | 0.08                 | 1.12 (0.96, 1.31)  | 0.14   |
| IGP37                      | Continuous | 0.17 (0.05)  | 0.16 (0.05)  | 6.17 (0.53, 72.39)  | 0.15                 | 6.98 (0.55, 89.35)  | 0.14                 | 7.93 (0.37, 168.5) | 0.18   |
|                            | RT         |              |              | 1.10 (0.97, 1.24)   | 0.13                 | 1.11 (0.98, 1.26)   | 0.11                 | 1.11 (0.95, 1.29)  | 0.19   |
| IGP38                      | Continuous | 0.14 (0.03)  | 0.14 (0.03)  | 17.82 (0.55, 577.2) | 0.11                 | 20.69 (0.56, 761.0) | 0.10                 | 21.73 (0.29, 1602) | 0.16   |
|                            | RT         |              |              | 1.11 (0.98, 1.26)   | 0.10                 | 1.12 (0.98, 1.27)   | 0.09                 | 1.12 (0.96, 1.30)  | 0.16   |
| IGP39                      | Continuous | 1.34 (0.33)  | 1.29 (0.30)  | 1.61 (1.10, 2.35)   | 0.02                 | 1.52 (1.03, 2.25)   | 0.04                 | 1.45 (0.90, 2.35)  | 0.13   |
|                            | RT         |              |              | 1.16 (1.03, 1.32)   | 0.02                 | 1.15 (1.01, 1.30)   | 0.03                 | 1.11 (0.95, 1.30)  | 0.17   |
| IGP40                      | Continuous | 0.56 (0.06)  | 0.55 (0.06)  | 13.15 (1.49, 116.1) | 0.02                 | 10.21 (1.10, 95.12) | 0.04                 | 5.86 (0.39, 88.93) | 0.20   |
|                            | RT         |              |              | 1.16 (1.03, 1.31)   | 0.02                 | 1.14 (1.01, 1.30)   | 0.04                 | 1.11 (0.95, 1.30)  | 0.18   |
| <b>Neutral IgG glycans</b> |            |              |              |                     |                      |                     |                      |                    |        |
| IGP43                      | Continuous | 31.61 (7.90) | 29.98 (7.18) | 1.03 (1.01, 1.05)   | 0.0004               | 1.03 (1.02, 1.05)   | 0.0001               | 1.03 (1.01, 1.05)  | 0.004  |
|                            | RT         |              |              | 1.24 (1.10, 1.41)   | 0.001                | 1.28 (1.12, 1.46)   | 0.0002               | 1.24 (1.06, 1.46)  | 0.008  |
| IGP45                      | Continuous | 7.73 (2.07)  | 7.31 (1.83)  | 1.11 (1.05, 1.18)   | 0.001                | 1.11 (1.04, 1.19)   | 0.001                | 1.08 (1.00, 1.17)  | 0.05   |
|                            | RT         |              |              | 1.23 (1.08, 1.39)   | 0.001                | 1.22 (1.07, 1.40)   | 0.004                | 1.16 (0.98, 1.36)  | 0.08   |
| IGP47                      | Continuous | 22.73 (2.97) | 23.17 (2.63) | 0.94 (0.90, 0.99)   | 0.01                 | 0.94 (0.90, 0.98)   | 0.009                | 0.94 (0.89, 1.00)  | 0.04   |
|                            | RT         |              |              | 0.86 (0.75, 0.97)   | 0.02                 | 0.85 (0.74, 0.97)   | 0.02                 | 0.86 (0.74, 1.00)  | 0.06   |
| IGP48                      | Continuous | 11.72 (1.84) | 12.15 (1.78) | 0.88 (0.82, 0.94)   | 0.0002               | 0.88 (0.82, 0.94)   | 0.0003               | 0.86 (0.79, 0.94)  | 0.0004 |
|                            | RT         |              |              | 0.79 (0.70, 0.90)   | 0.0002               | 0.79 (0.70, 0.90)   | 0.0003               | 0.76 (0.66, 0.89)  | 0.0004 |
| IGP49                      | Continuous | 6.86 (1.56)  | 6.85 (1.50)  | 1.00 (0.92, 1.08)   | 0.96                 | 0.97 (0.89, 1.05)   | 0.47                 | 0.96 (0.87, 1.06)  | 0.42   |
|                            | RT         |              |              | 0.99 (0.87, 1.12)   | 0.88                 | 0.95 (0.84, 1.07)   | 0.41                 | 0.93 (0.81, 1.08)  | 0.36   |
| IGP53                      | Continuous | 13.10 (4.34) | 14.10 (4.35) | 0.94 (0.92, 0.97)   | 0.0002               | 0.94 (0.91, 0.97)   | 0.0001               | 0.95 (0.92, 0.99)  | 0.02   |
|                            | RT         |              |              | 0.77 (0.68, 0.88)   | 7.4x10 <sup>-5</sup> | 0.75 (0.65, 0.86)   | 3.2x10 <sup>-5</sup> | 0.79 (0.67, 0.94)  | 0.007  |
| IGP54                      | Continuous | 1.76 (0.54)  | 1.87 (0.59)  | 0.72 (0.58, 0.91)   | 0.005                | 0.70 (0.56, 0.88)   | 0.003                | 0.78 (0.59, 1.04)  | 0.09   |
|                            | RT         |              |              | 0.83 (0.73, 0.94)   | 0.004                | 0.82 (0.73, 0.93)   | 0.002                | 0.87 (0.74, 1.01)  | 0.07   |

| <b>Galactosylation</b>                        |            |              |              |                    |                      |                    |                      |                    |        |
|-----------------------------------------------|------------|--------------|--------------|--------------------|----------------------|--------------------|----------------------|--------------------|--------|
| IGP55                                         | Continuous | 40.35 (9.00) | 38.27 (8.29) | 1.03 (1.01, 1.04)  | 8.3x10 <sup>-5</sup> | 1.03 (1.02, 1.05)  | 2.4x10 <sup>-5</sup> | 1.03 (1.01, 1.05)  | 0.002  |
|                                               | RT         |              |              | 1.28 (1.12, 1.45)  | 0.0002               | 1.32 (1.15, 1.51)  | 5.3x10 <sup>-5</sup> | 1.27 (1.08, 1.50)  | 0.005  |
| IGP56                                         | Continuous | 43.11 (4.56) | 43.99 (3.79) | 0.95 (0.92, 0.98)  | 0.0003               | 0.94 (0.92, 0.97)  | 6.8x10 <sup>-5</sup> | 0.94 (0.91, 0.97)  | 0.0005 |
|                                               | RT         |              |              | 0.82 (0.72, 0.93)  | 0.003                | 0.80 (0.70, 0.91)  | 0.001                | 0.79 (0.67, 0.93)  | 0.004  |
| IGP57                                         | Continuous | 16.08 (5.03) | 17.29 (5.12) | 0.95 (0.93, 0.98)  | 0.0002               | 0.95 (0.92, 0.97)  | 0.0001               | 0.96 (0.93, 0.99)  | 0.02   |
|                                               | RT         |              |              | 0.77 (0.68, 0.88)  | 6.2x10 <sup>-5</sup> | 0.75 (0.65, 0.86)  | 2.9x10 <sup>-5</sup> | 0.80 (0.67, 0.94)  | 0.008  |
| <b>Core fucosylation and bisecting GlcNAc</b> |            |              |              |                    |                      |                    |                      |                    |        |
| IGP62                                         | Continuous | 79.40 (3.90) | 79.63 (3.54) | 0.98 (0.95, 1.02)  | 0.34                 | 0.99 (0.96, 1.03)  | 0.68                 | 0.99 (0.95, 1.04)  | 0.77   |
|                                               | RT         |              |              | 0.95 (0.84, 1.08)  | 0.43                 | 0.98 (0.87, 1.12)  | 0.80                 | 0.99 (0.85, 1.15)  | 0.87   |
| IGP63                                         | Continuous | 78.59 (4.39) | 78.61 (4.18) | 1.00 (0.97, 1.03)  | 0.99                 | 1.01 (0.98, 1.04)  | 0.57                 | 1.01 (0.97, 1.04)  | 0.67   |
|                                               | RT         |              |              | 1.01 (0.89, 1.14)  | 0.93                 | 1.04 (0.92, 1.18)  | 0.51                 | 1.04 (0.90, 1.21)  | 0.61   |
| IGP64                                         | Continuous | 79.92 (3.92) | 80.30 (3.65) | 0.98 (0.94, 1.01)  | 0.14                 | 0.98 (0.95, 1.02)  | 0.33                 | 0.98 (0.95, 1.01)  | 0.43   |
|                                               | RT         |              |              | 0.92 (0.81, 1.04)  | 0.18                 | 0.95 (0.84, 1.08)  | 0.41                 | 0.95 (0.82, 1.10)  | 0.50   |
| IGP66                                         | Continuous | 17.41 (3.29) | 17.09 (2.98) | 1.03 (0.99, 1.07)  | 0.12                 | 1.02 (0.98, 1.06)  | 0.37                 | 1.01 (0.96, 1.06)  | 0.68   |
|                                               | RT         |              |              | 1.09 (0.96, 1.23)  | 0.17                 | 1.05 (0.92, 1.19)  | 0.49                 | 1.02 (0.88, 1.19)  | 0.77   |
| IGP67                                         | Continuous | 19.40 (3.95) | 19.36 (3.72) | 1.00 (0.97, 1.03)  | 0.94                 | 0.99 (0.96, 1.02)  | 0.57                 | 0.99 (0.95, 1.03)  | 0.62   |
|                                               | RT         |              |              | 1.00 (0.88, 1.13)  | 0.99                 | 0.96 (0.85, 1.09)  | 0.51                 | 0.96 (0.83, 1.11)  | 0.58   |
| IGP68                                         | Continuous | 18.35 (3.54) | 17.95 (3.34) | 1.03 (1.00, 1.07)  | 0.08                 | 1.02 (0.98, 1.06)  | 0.26                 | 1.02 (0.97, 1.06)  | 0.44   |
|                                               | RT         |              |              | 1.10 (0.98, 1.25)  | 0.12                 | 1.06 (0.94, 1.20)  | 0.34                 | 1.05 (0.91, 1.22)  | 0.52   |
| IGP70                                         | Continuous | 0.22 (0.05)  | 0.21 (0.05)  | 7.65 (0.66, 88.88) | 0.10                 | 3.42 (0.27, 42.66) | 0.34                 | 2.01 (0.10, 39.38) | 0.65   |
|                                               | RT         |              |              | 1.09 (0.96, 1.23)  | 0.19                 | 1.04 (0.92, 1.18)  | 0.53                 | 1.02 (0.88, 1.19)  | 0.79   |
| IGP71                                         | Continuous | 18.00 (3.49) | 17.68 (3.15) | 1.03 (0.99, 1.07)  | 0.14                 | 1.02 (0.98, 1.06)  | 0.42                 | 1.01 (0.96, 1.06)  | 0.68   |
|                                               | RT         |              |              | 1.08 (0.96, 1.23)  | 0.21                 | 1.04 (0.92, 1.18)  | 0.55                 | 1.03 (0.88, 1.19)  | 0.78   |
| IGP72                                         | Continuous | 4.62 (1.06)  | 4.68 (1.04)  | 0.95 (0.84, 1.07)  | 0.40                 | 0.99 (0.87, 1.12)  | 0.82                 | 1.00 (0.86, 1.15)  | 0.95   |
|                                               | RT         |              |              | 0.94 (0.83, 1.06)  | 0.30                 | 0.97 (0.86, 1.11)  | 0.69                 | 0.99 (0.85, 1.15)  | 0.88   |

Supplementary Table 6 All-cause mortality analysis by stage [Model II; rank transformed variables]

| Code                                                     | AJCC stage 1 (n=210) |         | AJCC stage 2 (n=327) |                      | AJCC stage 3 (n=313) |         | AJCC stage 4 (n=102) |         |
|----------------------------------------------------------|----------------------|---------|----------------------|----------------------|----------------------|---------|----------------------|---------|
|                                                          | HR (95% CI)          | p-value | HR (95% CI)          | p-value              | HR (95% CI)          | p-value | HR (95% CI)          | p-value |
| <b>Total IgG glycans (neutral and charged); Measured</b> |                      |         |                      |                      |                      |         |                      |         |
| IGP3                                                     | 1.32 (0.96, 1.81)    | 0.09    | 1.93 (0.99, 3.78)    | 0.05                 | 1.27 (1.05, 1.55)    | 0.02    | 1.15 (0.93, 1.42)    | 0.21    |
| IGP5                                                     | 1.29 (0.92, 1.82)    | 0.14    | 1.46 (1.16, 1.84)    | 0.001                | 1.20 (0.99, 1.47)    | 0.07    | 1.01 (0.83, 1.24)    | 0.90    |
| IGP7                                                     | 0.65 (0.47, 0.90)    | 0.009   | 0.76 (0.61, 0.96)    | 0.02                 | 0.95 (0.79, 1.13)    | 0.55    | 1.00 (0.81, 1.22)    | 0.97    |
| IGP8                                                     | 0.77 (0.56, 1.06)    | 0.11    | 0.57 (0.46, 0.72)    | 9.3x10 <sup>-7</sup> | 0.84 (0.71, 0.99)    | 0.04    | 1.25 (1.00, 1.57)    | 0.05    |
| IGP9                                                     | 0.95 (0.70, 1.29)    | 0.73    | 1.03 (0.83, 1.28)    | 0.77                 | 0.98 (0.82, 1.18)    | 0.85    | 0.89 (0.70, 1.12)    | 0.32    |
| IGP13                                                    | 0.76 (0.55, 1.05)    | 0.09    | 0.72 (0.57, 0.93)    | 0.01                 | 0.77 (0.62, 0.95)    | 0.02    | 0.91 (0.74, 1.12)    | 0.38    |
| IGP14                                                    | 0.89 (0.64, 1.23)    | 0.47    | 0.90 (0.72, 1.13)    | 0.38                 | 0.85 (0.71, 1.03)    | 0.09    | 0.93 (0.73, 1.18)    | 0.55    |
| IGP17                                                    | 0.87 (0.63, 1.19)    | 0.38    | 0.79 (0.62, 1.01)    | 0.06                 | 0.81 (0.67, 0.99)    | 0.04    | 0.79 (0.65, 0.97)    | 0.02    |
| IGP18                                                    | 0.91 (0.67, 1.23)    | 0.54    | 0.86 (0.70, 1.07)    | 0.17                 | 1.02 (0.88, 1.19)    | 0.77    | 1.09 (0.85, 1.40)    | 0.49    |
| <b>Sialylation</b>                                       |                      |         |                      |                      |                      |         |                      |         |
| IGP24                                                    | 1.19 (0.87, 1.64)    | 0.28    | 1.08 (0.86, 1.35)    | 0.51                 | 0.92 (0.77, 1.09)    | 0.32    | 0.75 (0.63, 0.91)    | 0.003   |
| IGP25                                                    | 1.04 (0.76, 1.42)    | 0.80    | 0.97 (0.78, 1.20)    | 0.76                 | 1.03 (0.88, 1.21)    | 0.70    | 1.00 (0.78, 1.28)    | 0.98    |
| IGP26                                                    | 0.90 (0.66, 1.22)    | 0.49    | 0.86 (0.68, 1.08)    | 0.20                 | 0.80 (0.67, 0.97)    | 0.02    | 0.78 (0.63, 0.95)    | 0.01    |
| IGP27                                                    | 0.91 (0.66, 1.25)    | 0.57    | 0.84 (0.68, 1.03)    | 0.10                 | 0.96 (0.82, 1.13)    | 0.66    | 0.98 (0.78, 1.23)    | 0.88    |
| IGP29                                                    | 1.43 (1.05, 1.96)    | 0.03    | 1.19 (0.95, 1.50)    | 0.13                 | 1.11 (0.93, 1.33)    | 0.24    | 0.73 (0.60, 0.89)    | 0.002   |
| IGP31                                                    | 0.97 (0.71, 1.33)    | 0.84    | 0.87 (0.70, 1.07)    | 0.19                 | 1.17 (0.99, 1.38)    | 0.06    | 1.39 (1.09, 1.76)    | 0.008   |
| <b>Bisecting GlcNAc</b>                                  |                      |         |                      |                      |                      |         |                      |         |
| IGP36                                                    | 1.12 (0.81, 1.55)    | 0.48    | 1.18 (0.93, 1.49)    | 0.18                 | 1.18 (0.98, 1.41)    | 0.08    | 1.24 (0.98, 1.57)    | 0.07    |
| IGP37                                                    | 1.04 (0.76, 1.42)    | 0.81    | 1.05 (0.85, 1.33)    | 0.70                 | 1.19 (1.00, 1.43)    | 0.05    | 1.36 (1.09, 1.71)    | 0.008   |
| IGP38                                                    | 1.06 (0.77, 1.46)    | 0.72    | 1.06 (0.83, 1.35)    | 0.64                 | 1.19 (1.00, 1.43)    | 0.05    | 1.36 (1.08, 1.71)    | 0.008   |
| IGP39                                                    | 1.17 (0.86, 1.59)    | 0.33    | 1.26 (1.00, 1.59)    | 0.05                 | 1.23 (1.02, 1.47)    | 0.03    | 1.05 (0.86, 1.30)    | 0.63    |
| IGP40                                                    | 1.16 (0.85, 1.59)    | 0.34    | 1.25 (0.99, 1.58)    | 0.06                 | 1.22 (1.02, 1.47)    | 0.03    | 1.05 (0.85, 1.29)    | 0.65    |
| <b>Neutral IgG glycans</b>                               |                      |         |                      |                      |                      |         |                      |         |
| IGP43                                                    | 1.35 (0.98, 1.85)    | 0.07    | 1.25 (0.98, 1.60)    | 0.07                 | 1.27 (1.04, 1.54)    | 0.02    | 1.12 (0.91, 1.39)    | 0.29    |
| IGP45                                                    | 1.29 (0.92, 1.82)    | 0.14    | 1.49 (1.18, 1.88)    | 0.001                | 1.17 (0.96, 1.43)    | 0.11    | 0.96 (0.78, 1.19)    | 0.74    |
| IGP47                                                    | 0.67 (0.48, 0.92)    | 0.02    | 0.75 (0.60, 0.95)    | 0.02                 | 0.89 (0.74, 1.07)    | 0.20    | 0.90 (0.74, 1.09)    | 0.29    |
| IGP48                                                    | 0.78 (0.57, 1.06)    | 0.12    | 0.57 (0.46, 0.72)    | 8.1x10 <sup>-7</sup> | 0.79 (0.66, 0.95)    | 0.01    | 1.16 (0.92, 1.47)    | 0.20    |
| IGP49                                                    | 0.94 (0.68, 1.28)    | 0.68    | 1.01 (0.82, 1.25)    | 0.92                 | 0.95 (0.80, 1.14)    | 0.58    | 0.83 (0.66, 1.05)    | 0.12    |

|                                               |                   |      |                   |       |                   |       |                   |      |
|-----------------------------------------------|-------------------|------|-------------------|-------|-------------------|-------|-------------------|------|
| IGP53                                         | 0.77 (0.56, 1.06) | 0.11 | 0.73 (0.57, 0.93) | 0.01  | 0.77 (0.62, 0.94) | 0.01  | 0.89 (0.72, 1.09) | 0.25 |
| IGP54                                         | 0.88 (0.64, 1.23) | 0.46 | 0.90 (0.71, 1.12) | 0.34  | 0.85 (0.70, 1.01) | 0.07  | 0.90 (0.71, 1.12) | 0.34 |
| <b>Galactosylation</b>                        |                   |      |                   |       |                   |       |                   |      |
| IGP55                                         | 1.39 (1.00, 1.92) | 0.05 | 1.38 (1.08, 1.76) | 0.009 | 1.31 (1.07, 1.60) | 0.01  | 1.10 (0.89, 1.35) | 0.38 |
| IGP56                                         | 0.71 (0.51, 0.98) | 0.04 | 0.69 (0.54, 0.87) | 0.002 | 0.80 (0.66, 0.98) | 0.03  | 0.95 (0.77, 1.17) | 0.64 |
| IGP57                                         | 0.78 (0.56, 1.07) | 0.12 | 0.78 (0.61, 0.99) | 0.05  | 0.76 (0.66, 0.93) | 0.008 | 0.91 (0.73, 1.12) | 0.35 |
| <b>Core fucosylation and bisecting GlcNAc</b> |                   |      |                   |       |                   |       |                   |      |
| IGP62                                         | 0.94 (0.68, 1.31) | 0.73 | 0.75 (0.60, 0.94) | 0.01  | 1.00 (0.84, 1.19) | 0.99  | 1.03 (0.80, 1.32) | 0.82 |
| IGP63                                         | 1.03 (0.76, 1.41) | 0.85 | 0.84 (0.64, 1.01) | 0.06  | 1.03 (0.87, 1.23) | 0.74  | 1.14 (0.91, 1.44) | 0.25 |
| IGP64                                         | 0.83 (0.60, 1.15) | 0.26 | 0.77 (0.62, 0.96) | 0.02  | 0.97 (0.81, 1.15) | 0.69  | 1.09 (0.85, 1.41) | 0.50 |
| IGP66                                         | 1.13 (0.82, 1.55) | 0.47 | 1.25 (1.00, 1.55) | 0.05  | 1.03 (0.86, 1.23) | 0.73  | 0.87 (0.70, 1.10) | 0.24 |
| IGP67                                         | 0.99 (0.73, 1.35) | 0.97 | 1.15 (0.95, 1.49) | 0.13  | 0.96 (0.80, 1.14) | 0.64  | 0.84 (0.68, 1.05) | 0.12 |
| IGP68                                         | 1.20 (0.87, 1.66) | 0.26 | 1.24 (1.00, 1.53) | 0.05  | 1.05 (0.88, 1.25) | 0.58  | 0.86 (0.68, 1.10) | 0.23 |
| IGP70                                         | 1.13 (0.81, 1.57) | 0.47 | 1.28 (1.02, 1.59) | 0.03  | 1.02 (0.86, 1.22) | 0.79  | 0.88 (0.69, 1.11) | 0.28 |
| IGP71                                         | 1.11 (0.81, 1.53) | 0.52 | 1.27 (1.02, 1.58) | 0.03  | 1.02 (0.86, 1.22) | 0.79  | 0.89 (0.71, 1.12) | 0.32 |
| IGP72                                         | 0.91 (0.66, 1.26) | 0.59 | 0.79 (0.63, 0.98) | 0.03  | 0.99 (0.83, 1.18) | 0.92  | 1.11 (0.88, 1.40) | 0.38 |

Supplementary Table 7 CRC-specific mortality analysis by stage [Model II; rank transformed variables]

| Code                                                     | AJCC stage 1 (n=210) |         | AJCC stage 2 (n=327) |         | AJCC stage 3 (n=313) |         | AJCC stage 4 (n=102) |         |
|----------------------------------------------------------|----------------------|---------|----------------------|---------|----------------------|---------|----------------------|---------|
|                                                          | HR (95% CI)          | p-value | HR (95% CI)          | p-value | HR (95% CI)          | p-value | HR (95% CI)          | p-value |
| <b>Total IgG glycans (neutral and charged); Measured</b> |                      |         |                      |         |                      |         |                      |         |
| IGP3                                                     | 1.14 (0.67, 1.95)    | 0.63    | 1.21 (0.90, 1.62)    | 0.21    | 1.26 (1.02, 1.55)    | 0.04    | 1.15 (0.92, 1.43)    | 0.21    |
| IGP5                                                     | 0.94 (0.55, 1.61)    | 0.82    | 1.35 (1.01, 1.80)    | 0.04    | 1.10 (0.88, 1.36)    | 0.40    | 1.01 (0.82, 1.24)    | 0.94    |
| IGP7                                                     | 0.81 (0.48, 1.35)    | 0.42    | 0.74 (0.56, 0.98)    | 0.04    | 0.96 (0.79, 1.17)    | 0.71    | 1.00 (0.81, 1.24)    | 0.97    |
| IGP8                                                     | 0.72 (0.42, 1.24)    | 0.24    | 0.67 (0.51, 0.88)    | 0.004   | 0.85 (0.71, 1.02)    | 0.09    | 1.25 (0.99, 1.57)    | 0.06    |
| IGP9                                                     | 0.86 (0.52, 1.42)    | 0.56    | 1.00 (0.77, 1.31)    | 0.98    | 0.92 (0.76, 1.12)    | 0.42    | 0.88 (0.69, 1.12)    | 0.30    |
| IGP13                                                    | 0.98 (0.57, 1.69)    | 0.95    | 0.76 (0.56, 1.03)    | 0.08    | 0.78 (0.62, 0.98)    | 0.04    | 0.91 (0.71, 1.13)    | 0.39    |
| IGP14                                                    | 0.85 (0.50, 1.46)    | 0.56    | 0.91 (0.69, 1.20)    | 0.51    | 0.86 (0.70, 1.05)    | 0.13    | 0.92 (0.72, 1.18)    | 0.53    |
| IGP17                                                    | 1.12 (0.65, 1.94)    | 0.68    | 0.82 (0.61, 1.11)    | 0.20    | 0.85 (0.68, 1.05)    | 0.13    | 0.79 (0.64, 0.97)    | 0.02    |
| IGP18                                                    | 1.03 (0.62, 1.70)    | 0.92    | 0.84 (0.64, 1.08)    | 0.18    | 1.04 (0.88, 1.23)    | 0.64    | 1.07 (0.83, 1.38)    | 0.61    |
| <b>Sialylation</b>                                       |                      |         |                      |         |                      |         |                      |         |
| IGP24                                                    | 1.29 (0.77, 2.18)    | 0.34    | 1.05 (0.79, 1.39)    | 0.74    | 0.96 (0.79, 1.16)    | 0.64    | 0.75 (0.62, 0.90)    | 0.003   |
| IGP25                                                    | 1.23 (0.72, 2.11)    | 0.44    | 0.93 (0.71, 1.22)    | 0.61    | 1.08 (0.91, 1.29)    | 0.39    | 1.00 (0.78, 1.28)    | 0.99    |
| IGP26                                                    | 1.08 (0.64, 1.82)    | 0.77    | 0.87 (0.66, 1.16)    | 0.35    | 0.84 (0.68, 1.03)    | 0.09    | 0.77 (0.62, 0.95)    | 0.01    |
| IGP27                                                    | 1.19 (0.69, 2.05)    | 0.53    | 0.84 (0.64, 1.08)    | 0.18    | 1.02 (0.86, 1.22)    | 0.79    | 0.98 (0.77, 1.23)    | 0.85    |
| IGP29                                                    | 1.40 (0.85, 2.31)    | 0.19    | 1.17 (0.88, 1.55)    | 0.28    | 1.14 (0.94, 1.38)    | 0.20    | 0.73 (0.60, 0.90)    | 0.002   |
| IGP31                                                    | 1.05 (0.63, 1.73)    | 0.86    | 0.89 (0.69, 1.16)    | 0.41    | 1.18 (0.98, 1.42)    | 0.07    | 1.38 (1.08, 1.76)    | 0.01    |
| <b>Bisecting GlcNAc</b>                                  |                      |         |                      |         |                      |         |                      |         |
| IGP36                                                    | 1.02 (0.61, 1.72)    | 0.94    | 1.10 (0.82, 1.46)    | 0.53    | 1.15 (0.95, 1.40)    | 0.15    | 1.23 (0.97, 1.57)    | 0.09    |
| IGP37                                                    | 0.98 (0.59, 1.63)    | 0.94    | 0.99 (0.74, 1.33)    | 0.96    | 1.18 (0.97, 1.44)    | 0.10    | 1.36 (1.07, 1.71)    | 0.01    |
| IGP38                                                    | 0.99 (0.59, 1.65)    | 0.96    | 1.01 (0.75, 1.36)    | 0.93    | 1.18 (0.98, 1.44)    | 0.09    | 1.35 (1.07, 1.71)    | 0.01    |
| IGP39                                                    | 0.91 (0.55, 1.49)    | 0.71    | 1.22 (0.91, 1.63)    | 0.18    | 1.11 (0.91, 1.36)    | 0.29    | 1.05 (0.85, 1.30)    | 0.64    |
| IGP40                                                    | 0.91 (0.55, 1.50)    | 0.71    | 1.21 (0.90, 1.61)    | 0.21    | 1.11 (0.91, 1.36)    | 0.29    | 1.05 (0.85, 1.30)    | 0.66    |
| <b>Neutral IgG glycans</b>                               |                      |         |                      |         |                      |         |                      |         |
| IGP43                                                    | 1.20 (0.70, 2.05)    | 0.51    | 1.21 (0.90, 1.63)    | 0.21    | 1.22 (1.02, 1.56)    | 0.03    | 1.12 (0.90, 1.40)    | 0.30    |
| IGP45                                                    | 0.95 (0.55, 1.63)    | 0.85    | 1.37 (1.02, 1.83)    | 0.03    | 1.08 (0.87, 1.33)    | 0.51    | 0.96 (0.77, 1.19)    | 0.69    |
| IGP47                                                    | 0.87 (0.51, 1.47)    | 0.60    | 0.74 (0.56, 0.99)    | 0.04    | 0.92 (0.75, 1.12)    | 0.41    | 0.90 (0.74, 1.10)    | 0.32    |
| IGP48                                                    | 0.78 (0.46, 1.31)    | 0.34    | 0.67 (0.51, 0.88)    | 0.003   | 0.82 (0.67, 0.99)    | 0.04    | 1.16 (0.91, 1.47)    | 0.23    |
| IGP49                                                    | 0.87 (0.53, 1.45)    | 0.60    | 0.99 (0.76, 1.29)    | 0.93    | 0.90 (0.74, 1.10)    | 0.30    | 0.82 (0.65, 1.04)    | 0.11    |

|                                               |                   |      |                   |      |                   |      |                   |      |
|-----------------------------------------------|-------------------|------|-------------------|------|-------------------|------|-------------------|------|
| IGP53                                         | 1.00 (0.58, 1.72) | 0.99 | 0.77 (0.57, 1.04) | 0.09 | 0.79 (0.63, 0.98) | 0.04 | 0.88 (0.72, 1.09) | 0.26 |
| IGP54                                         | 0.88 (0.51, 1.50) | 0.63 | 0.91 (0.69, 1.20) | 0.49 | 0.85 (0.70, 1.04) | 0.12 | 0.89 (0.70, 1.12) | 0.32 |
| <b>Galactosylation</b>                        |                   |      |                   |      |                   |      |                   |      |
| IGP55                                         | 1.14 (0.66, 1.97) | 0.64 | 1.30 (0.96, 1.75) | 0.09 | 1.27 (1.02, 1.59) | 0.03 | 1.10 (0.89, 1.36) | 0.40 |
| IGP56                                         | 0.76 (0.45, 1.29) | 0.32 | 0.73 (0.55, 0.98) | 0.04 | 0.82 (0.66, 1.02) | 0.07 | 0.95 (0.77, 1.18) | 0.65 |
| IGP57                                         | 0.96 (0.56, 1.65) | 0.88 | 0.82 (0.61, 1.10) | 0.18 | 0.78 (0.62, 0.97) | 0.03 | 0.90 (0.73, 1.12) | 0.36 |
| <b>Core fucosylation and bisecting GlcNAc</b> |                   |      |                   |      |                   |      |                   |      |
| IGP62                                         | 1.19 (0.69, 2.05) | 0.53 | 0.80 (0.61, 1.05) | 0.11 | 1.06 (0.88, 1.29) | 0.52 | 1.04 (0.81, 1.33) | 0.78 |
| IGP63                                         | 1.23 (0.73, 2.06) | 0.44 | 0.87 (0.65, 1.15) | 0.33 | 1.10 (0.91, 1.33) | 0.32 | 1.15 (0.91, 1.45) | 0.25 |
| IGP64                                         | 0.99 (0.58, 1.68) | 0.96 | 0.80 (0.61, 1.06) | 0.12 | 1.03 (0.85, 1.24) | 0.77 | 1.11 (0.85, 1.43) | 0.45 |
| IGP66                                         | 0.88 (0.52, 1.47) | 0.61 | 1.18 (0.90, 1.55) | 0.22 | 0.96 (0.79, 1.17) | 0.68 | 0.86 (0.69, 1.09) | 0.21 |
| IGP67                                         | 0.84 (0.50, 1.38) | 0.49 | 1.14 (0.86, 1.50) | 0.36 | 0.90 (0.74, 1.09) | 0.29 | 0.84 (0.67, 1.04) | 0.12 |
| IGP68                                         | 0.98 (0.58, 1.64) | 0.93 | 1.19 (0.91, 1.55) | 0.19 | 0.98 (0.81, 1.19) | 0.84 | 0.85 (0.67, 1.09) | 0.20 |
| IGP70                                         | 0.87 (0.51, 1.47) | 0.61 | 1.22 (0.92, 1.60) | 0.16 | 0.95 (0.78, 1.15) | 0.61 | 0.87 (0.68, 1.10) | 0.25 |
| IGP71                                         | 0.87 (0.52, 1.46) | 0.59 | 1.20 (0.92, 1.58) | 0.18 | 0.95 (0.79, 1.16) | 0.64 | 0.88 (0.70, 1.11) | 0.29 |
| IGP72                                         | 1.17 (0.70, 1.98) | 0.55 | 0.83 (0.63, 1.09) | 0.17 | 1.06 (0.88, 1.29) | 0.54 | 1.12 (0.89, 1.42) | 0.33 |

**Supplementary Table 8 Multivariate Cox regression and estimate of the Harrell's concordance coefficient of the a) clinical parameters and b) clinical and glycan parameters by AJCC stage for all-cause mortality**

|                              | Stage 1              |         | Stage 2                  |                      | Stage 3                  |         | Stage 4                  |         |
|------------------------------|----------------------|---------|--------------------------|----------------------|--------------------------|---------|--------------------------|---------|
| Clinical algorithm           | All-cause mortality  |         | All-cause mortality      |                      | All-cause mortality      |         | All-cause mortality      |         |
|                              | HR (95% CI)          | p-value | HR (95% CI)              | p-value              | HR (95% CI)              | p-value | HR (95% CI)              | p-value |
| Age                          | 1.07 (1.03, 1.11)    | 0.0006  | 1.04 (1.02, 1.07)        | 0.0009               | 1.02 (1.00, 1.04)        | 0.03    | 1.01 (0.99, 1.03)        | 0.44    |
| Sex                          | 0.73 (0.40, 1.34)    | 0.31    | 0.96 (0.63, 1.46)        | 0.85                 | 0.95 (0.68, 1.33)        | 0.77    | 0.94 (0.63, 1.40)        | 0.76    |
| CRP                          | 2.84 (1.20, 6.78)    | 0.02    | 1.96 (1.06, 3.63)        | 0.18                 | 1.70 (1.02, 2.83)        | 0.04    | 1.95 (1.18, 3.22)        | 0.01    |
| BMI                          | 1.02 (0.95, 1.10)    | 0.61    | 1.09 (1.04, 1.14)        | 0.0005               | 1.01 (0.97, 1.05)        | 0.49    | 1.04 (0.99, 1.08)        | 0.10    |
| <i>Harrell's C</i>           | <i>0.68</i>          |         | <i>0.65</i>              |                      | <i>0.55</i>              |         | <i>0.61</i>              |         |
| <i>IDI</i>                   | <i>n/a*</i>          |         | <i>0.09<sup>§</sup></i>  |                      | <i>0.08<sup>§</sup></i>  |         | <i>0.13<sup>§</sup></i>  |         |
| <i>AUC</i>                   | <i>n/a*</i>          |         | <i>0.66</i>              |                      | <i>0.58</i>              |         | <i>0.63</i>              |         |
| Clinical & glycans algorithm | All-cause mortality* |         | All-cause mortality      |                      | All-cause mortality      |         | All-cause mortality      |         |
|                              | HR (95% CI)          | p-value | HR (95% CI)              | p-value              | HR (95% CI)              | p-value | HR (95% CI)              | p-value |
| Age                          |                      |         | 1.04 (1.01, 1.06)        | 0.006                | 1.01 (0.99, 1.03)        | 0.23    | 1.00 (0.98, 1.02)        | 0.45    |
| Sex                          |                      |         | 0.98 (0.64, 1.50)        | 0.93                 | 0.94 (0.67, 1.32)        | 0.73    | 1.00 (0.66, 1.52)        | 0.67    |
| CRP                          |                      |         | 2.33 (1.24, 4.39)        | 0.01                 | 1.47 (0.88, 2.47)        | 0.14    | 1.53 (0.86, 2.73)        | 0.03    |
| BMI                          |                      |         | 1.07 (1.02, 1.12)        | 0.003                | 1.01 (0.97, 1.05)        | 0.65    | 1.03 (0.98, 1.08)        | 0.05    |
| Top Glycan 1**               |                      |         | 0.59 (0.46, 0.76)        | 2.6x10 <sup>-5</sup> | 1.06 (0.85,1.32)         | 0.61    | 1.11 (0.81, 1.51)        | 0.53    |
| Top Glycan 2**               |                      |         | 0.95 (0.77, 1.17)        | 0.63                 | 1.39 (1.03, 1.89)        | 0.03    | 0.98 (0.72, 1.33)        | 0.90    |
| Top Glycan 3**               |                      |         | 1.06 (0.83, 1.35)        | 0.62                 | 0.75 (0.55, 1.01)        | 0.06    | 0.77 (0.58, 1.02)        | 0.07    |
| <i>Harrell's C</i>           |                      |         | <i>0.67</i>              |                      | <i>0.53</i>              |         | <i>0.61</i>              |         |
| <i>IDI</i>                   |                      |         | <i>0.15<sup>§§</sup></i> |                      | <i>0.12<sup>§§</sup></i> |         | <i>0.41<sup>§§</sup></i> |         |
| <i>AUC</i>                   |                      |         | <i>0.72</i>              |                      | <i>0.60</i>              |         | <i>0.69</i>              |         |

\* Due to the low number of observations, cross-validation was not possible and therefore we could not calculate the IDI and AUC values. Harrell's C coefficient were calculated based on the fitting all dataset



§ The IDI was calculated based on the comparison of the model II (adjusted for AJCC, age and sex) and the full clinical model III (adjusted for stage, age, sex, BMI and CRP – presented here).

\*\* Top Glycans for: Stage 2 IGP48, IGP18, IGP43; Stage 3 IGP43, IGP29, IGP24; Stage 4 IGP27, IGP49, IGP17

§§ The IDI was calculated based on the comparison of full clinical model III (adjusted for stage, age, sex, bmi and CRP) and the model with these clinical factors plus the three top selected glycans.

Supplementary Table 9 Multivariate Cox regression and estimate of the Harrell's concordance coefficient of the a) clinical parameters and b) clinical and glycan parameters by AJCC stage for CRC mortality

| Clinical algorithm          | Stage 1            |         | Stage 2                  |                      | Stage 3                  |         | Stage 4                  |         |
|-----------------------------|--------------------|---------|--------------------------|----------------------|--------------------------|---------|--------------------------|---------|
|                             | CRC mortality      |         | CRC mortality            |                      | CRC mortality            |         | CRC mortality            |         |
|                             | HR (95% CI)        | p-value | HR (95% CI)              | p-value              | HR (95% CI)              | p-value | HR (95% CI)              | p-value |
| Age                         | 1.06 (1.00, 1.12)  | 0.05    | 1.03 (1.00, 1.06)        | 0.05                 | 1.01 (0.99-1.03)         | 0.23    | 1.01 (0.99, 1.03)        | 0.48    |
| Sex                         | 0.59 (0.21, 1.64)  | 0.31    | 1.35 (0.82, 2.22)        | 0.24                 | 1.02 (0.71-1.46)         | 0.92    | 0.97 (0.65, 1.44)        | 0.86    |
| CRP                         | 1.04 (0.93, 1.16)  | 0.49    | 2.09 (1.02, 4.3)         | 0.04                 | 1.92 (1.13-3.25)         | 0.02    | 1.04 (0.99, 1.08)        | 0.09    |
| BMI                         | 2.52 (0.57, 11.19) | 0.22    | 1.13 (1.07, 1.19)        | 7.9x10 <sup>-6</sup> | 1.02 (0.98-1.06)         | 0.34    | 1.04 (0.99, 1.08)        | 0.07    |
| <i>Harrell's C</i>          | <i>0.68</i>        |         | <i>0.63</i>              |                      | <i>0.55</i>              |         | <i>0.56</i>              |         |
| <i>IDI</i>                  | <i>n/a*</i>        |         | <i>0.11<sup>s</sup></i>  |                      | <i>0.06<sup>s</sup></i>  |         | <i>0.12<sup>s</sup></i>  |         |
| <i>AUC</i>                  | <i>n/a*</i>        |         | <i>0.68</i>              |                      | <i>0.56</i>              |         | <i>0.63</i>              |         |
| Clinical & glycan algorithm | CRC mortality*     |         | CRC mortality            |                      | CRC mortality            |         | CRC mortality            |         |
|                             | HR (95% CI)        | p-value | HR (95% CI)              | p-value              | HR (95% CI)              | p-value | HR (95% CI)              | p-value |
| Age                         |                    |         | 1.02 (0.99,1.05)         | 0.17                 | 1.01 (0.99, 1.03)        | 0.22    | 1.01 (0.99, 1.03)        | 0.42    |
| Sex                         |                    |         | 1.38 (0.83,2.27)         | 0.21                 | 1.03 (0.71, 1.49)        | 0.87    | 1.09 (0.71, 1.66)        | 0.70    |
| CRP                         |                    |         | 2.32 (1.10,4.87)         | 0.03                 | 1.80 (1.06, 3.07)        | 0.03    | 2.22 (1.21, 4.06)        | 0.01    |
| BMI                         |                    |         | 1.11 (1.05,1.17)         | 8.34E-05             | 1.02 (0.98, 1.06)        | 0.39    | 1.04 (0.99, 1.09)        | 0.12    |
| Top Glycan 1**              |                    |         | 0.81 (0.24,2.68)         | 0.73                 | 0.91 (0.62, 1.34)        | 0.64    | 1.17 (0.87, 1.59)        | 0.29    |
| Top Glycan 2**              |                    |         | 0.87 (0.59,1.29)         | 0.50                 | 1.15 (0.95, 1.40)        | 0.16    | 0.70 (0.55,0.90)         | 0.005   |
| Top Glycan 3**              |                    |         | 0.88 (0.29,2.63)         | 0.82                 | 0.97 (0.66, 1.41)        | 0.87    | 0.87 (0.67, 1.13)        | 0.30    |
| <i>Harrell's C</i>          |                    |         | <i>0.61</i>              |                      | <i>0.51</i>              |         | <i>0.61</i>              |         |
| <i>IDI</i>                  |                    |         | <i>0.14<sup>ss</sup></i> |                      | <i>0.08<sup>ss</sup></i> |         | <i>0.43<sup>ss</sup></i> |         |
| <i>AUC</i>                  |                    |         | <i>0.71</i>              |                      | <i>0.59</i>              |         | <i>0.71</i>              |         |

\* Due to the low number of observations, cross-validation was not possible and therefore we could not calculate the IDI and AUC values. Harrell's C coefficient were calculated based on the fitting all dataset

§ The IDI was calculated based on the comparison of the model II (adjusted for AJCC, age and sex) and the full clinical model III (adjusted for stage, age, sex, BMI and CRP – presented here).

\*\* Top Glycans for: Stage 2 IGP48, IGP56, IGP8; Stage 3 IGP67, IGP29, IGP49. IGP49, IGP63 and IGP9 were prioritised equally by generalised boosted approach, but results for IGP49 is only presented; Stage 4 IGP27, IGP24, IGP49

§§ The IDI was calculated based on the comparison of full clinical model III (adjusted for stage, age, sex, bmi and CRP) and the model with these clinical factors plus the three top selected glycans

**Supplementary Table 10 Predictions of 5 year risk of CRC death for models with clinical factors and clinical and glycan factors using k-nearest neighbours, LASSO, Naïve Bayes, PAM, Support Vector Machines, Decision Trees, and Boosted Stump classifiers. The results are summarized over 10 cross-validation folds.**

| <b>Clinical model with age, sex and stage (n=950)</b>        |            |                 |            |                    |                    |
|--------------------------------------------------------------|------------|-----------------|------------|--------------------|--------------------|
|                                                              | <b>AUC</b> | <b>Accuracy</b> | <b>PPV</b> | <b>Sensitivity</b> | <b>Specificity</b> |
| <i>Maximum Prior</i>                                         | 0.5        | 0.7379          | -          | 0                  | 1                  |
| <i>k Nearest Neighbours</i>                                  | 0.6619     | 0.7284          | 0.4833     | 0.5221             | 0.8017             |
| <i>LASSO</i>                                                 | 0.7786     | 0.8189          | 0.8738     | 0.3614             | 0.9815             |
| <i>Naive Bayes normal</i>                                    | 0.7627     | 0.8179          | 0.8654     | 0.3614             | 0.9800             |
| <i>Naive Bayes kernel</i>                                    | 0.7587     | 0.8179          | 0.8654     | 0.3614             | 0.9800             |
| <i>PAM</i>                                                   | 0.7626     | 0.7379          | -          | 0                  | 1                  |
| <i>SVM linear</i>                                            | 0.6831     | 0.7253          | 0.4805     | 0.5944             | 0.7718             |
| <i>SVM quadratic</i>                                         | 0.6854     | 0.7000          | 0.4503     | 0.6546             | 0.7161             |
| <i>SVM cubic</i>                                             | 0.7047     | 0.6884          | 0.4434     | 0.7390             | 0.6705             |
| <i>SVM RBF</i>                                               | 0.7014     | 0.7389          | 0.5016     | 0.6125             | 0.7803             |
| <i>Decision Trees</i>                                        | 0.6430     | 0.8189          | 0.8738     | 0.3614             | 0.9815             |
| <i>Boosted stumps</i>                                        | 0.7691     | 0.8200          | 0.8750     | 0.3655             | 0.9815             |
| <b>Clinical model with age, sex, stage, BMI, CRP (n=950)</b> |            |                 |            |                    |                    |
|                                                              | <b>AUC</b> | <b>Accuracy</b> | <b>PPV</b> | <b>Sensitivity</b> | <b>Specificity</b> |
| <i>Maximum Prior</i>                                         | 0.5        | 0.7379          | -          | 0                  | 1                  |
| <i>k Nearest Neighbours</i>                                  | 0.6310     | 0.7211          | 0.4661     | 0.4418             | 0.8203             |
| <i>LASSO</i>                                                 | 0.8052     | 0.8105          | 0.7315     | 0.4378             | 0.9429             |
| <i>Naive Bayes normal</i>                                    | 0.8076     | 0.8116          | 0.7108     | 0.4739             | 0.9315             |
| <i>Naive Bayes kernel</i>                                    | 0.7962     | 0.8095          | 0.7931     | 0.3695             | 0.9658             |
| <i>PAM</i>                                                   | 0.8039     | 0.7379          | -          | 0                  | 1                  |
| <i>SVM linear</i>                                            | 0.7237     | 0.7337          | 0.4944     | 0.7028             | 0.7447             |
| <i>SVM quadratic</i>                                         | 0.7096     | 0.7568          | 0.5315     | 0.6104             | 0.8088             |
| <i>SVM cubic</i>                                             | 0.6884     | 0.7274          | 0.4840     | 0.6064             | 0.7703             |
| <i>SVM RBF</i>                                               | 0.6965     | 0.7221          | 0.4776     | 0.6426             | 0.7504             |
| <i>Decision Trees</i>                                        | 0.6476     | 0.8189          | 0.8738     | 0.3614             | 0.9815             |
| <i>Boosted stumps</i>                                        | 0.7978     | 0.8189          | 0.7770     | 0.4337             | 0.9558             |

Note to **Supplementary Tables 10-14**: In cross-validation, because training sets overlap, prediction errors over different folds and samples are not independent, which significantly complicates estimation of distribution of prediction (generalization) errors<sup>1</sup>. Although it is not uncommon to report variances or confidence intervals of prediction errors, we find them misleading, as they ignore the covariance structure of the test errors across multiple folds. We refer the readers to the result from machine learning literature showing that there are no universal unbiased estimates of the variance of the cross-validation error, and that “naïve estimators that do not take into account the error correlations between training and test sets (can) grossly underestimate the variance”<sup>2</sup>. For some special cases there exist biased task- and model-specific estimates (for example, Markatou et al.<sup>3</sup>), but to the best of our knowledge they have not yet been developed for the AUC criterion and our choice of the sparse parametric and non-parametric models chosen for their applicability to biomarker prediction studies. Supplementary Tables 10-16 summarize the aggregated AUCs over the

10 test folds not used during training, where all classifiers were calibrated to output conditional probabilities of the class given the covariates. Note that PPV, sensitivity, and specificity depend on the task-specific calibration; we show the results for the probability cut-off of 0.5.

**Supplementary Table 11 Predictions of 5 year risk of CRC death for models with the extended set of clinical factors with and without glycans using k-nearest neighbours, LASSO, PAM, Support Vector Machines, Decision Trees, and Boosted Stump classifiers. The results are summarized over 10 cross-validation folds.**

| <b>Clinical model with age, sex, BMI, CRP, type of operation, time between operation and blood collection, and stage of cancer (n=949)</b>                          |            |                 |            |                    |                    |
|---------------------------------------------------------------------------------------------------------------------------------------------------------------------|------------|-----------------|------------|--------------------|--------------------|
|                                                                                                                                                                     | <b>AUC</b> | <b>Accuracy</b> | <b>PPV</b> | <b>Sensitivity</b> | <b>Specificity</b> |
| <i>Maximum Prior</i>                                                                                                                                                | 0.5        | 0.7379          | -          | 0                  | 1                  |
| <i>k Nearest Neighbours</i>                                                                                                                                         | 0.6174     | 0.7081          | 0.4398     | 0.4274             | 0.8074             |
| <i>LASSO</i>                                                                                                                                                        | 0.8042     | 0.8061          | 0.7192     | 0.4234             | 0.9415             |
| <i>PAM</i>                                                                                                                                                          | 0.8036     | 0.7492          | 0.9167     | 0.0444             | 0.9986             |
| <i>SVM linear</i>                                                                                                                                                   | 0.7229     | 0.7292          | 0.4875     | 0.7097             | 0.7361             |
| <i>SVM cubic</i>                                                                                                                                                    | 0.7047     | 0.7408          | 0.5032     | 0.6290             | 0.7803             |
| <i>SVM RBF</i>                                                                                                                                                      | 0.6764     | 0.7144          | 0.4639     | 0.5968             | 0.7561             |
| <i>Decision Trees</i>                                                                                                                                               | 0.6331     | 0.8188          | 0.8725     | 0.3589             | 0.9815             |
| <i>Boosted stumps</i>                                                                                                                                               | 0.8086     | 0.8124          | 0.7431     | 0.4315             | 0.9472             |
| <b>Clinical model with age, sex, BMI, CRP, type of operation, time between operation and blood collection, stage of cancer, and log-transformed glycans (n=949)</b> |            |                 |            |                    |                    |
|                                                                                                                                                                     | <b>AUC</b> | <b>Accuracy</b> | <b>PPV</b> | <b>Sensitivity</b> | <b>Specificity</b> |
| <i>Maximum Prior</i>                                                                                                                                                | 0.5        | 0.7387          | -          | 0                  | 1                  |
| <i>k Nearest Neighbours</i>                                                                                                                                         | 0.5713     | 0.6881          | 0.3857     | 0.3266             | 0.8160             |
| <i>LASSO</i>                                                                                                                                                        | 0.7980     | 0.8093          | 0.7557     | 0.3992             | 0.9544             |
| <i>PAM</i>                                                                                                                                                          | 0.6918     | 0.7576          | 0.6667     | 0.1452             | 0.9743             |
| <i>SVM linear</i>                                                                                                                                                   | 0.7068     | 0.7208          | 0.4759     | 0.6774             | 0.7361             |
| <i>SVM cubic</i>                                                                                                                                                    | 0.6449     | 0.7218          | 0.4688     | 0.4839             | 0.8060             |
| <i>SVM RBF</i>                                                                                                                                                      | 0.5        | 0.7387          | -          | 0                  | 1                  |
| <i>Decision Trees</i>                                                                                                                                               | 0.6447     | 0.8188          | 0.8725     | 0.3589             | 0.9815             |
| <i>Boosted stumps</i>                                                                                                                                               | 0.7849     | 0.8072          | 0.7305     | 0.4153             | 0.9458             |

**Supplementary Table 12 Predictions of rapid progressors in stage 2 for models with the extended set of clinical factors with and without glycans using k-nearest neighbour, LASSO, PAM, Support Vector Machines, Decision Trees, and Boosted Stump classifiers. The results are summarized over 10 cross-validation folds.**

| <b>Clinical model for stage 2 with age, sex, BMI, CRP, type of operation, time between operation and blood collection, and stage of cancer (n=326)</b>                          |            |                 |            |                    |                    |
|---------------------------------------------------------------------------------------------------------------------------------------------------------------------------------|------------|-----------------|------------|--------------------|--------------------|
|                                                                                                                                                                                 | <b>AUC</b> | <b>Accuracy</b> | <b>PPV</b> | <b>Sensitivity</b> | <b>Specificity</b> |
| <i>Maximum Prior</i>                                                                                                                                                            | 0.5        | 0.9356          | -          | 0                  | 1                  |
| <i>k Nearest Neighbours</i>                                                                                                                                                     | 0.5863     | 0.8896          | 0.2000     | 0.2381             | 0.9344             |
| <i>LASSO</i>                                                                                                                                                                    | 0.7820     | 0.9356          | 0.5000     | 0.0476             | 0.9967             |
| <i>PAM</i>                                                                                                                                                                      | 0.7066     | 0.9356          | -          | 0                  | 1                  |
| <i>SVM linear</i>                                                                                                                                                               | 0.7440     | 0.7699          | 0.1786     | 0.7143             | 0.7738             |
| <i>SVM quadratic</i>                                                                                                                                                            | 0.6939     | 0.8006          | 0.1765     | 0.5714             | 0.8164             |
| <i>SVM cubic</i>                                                                                                                                                                | 0.6200     | 0.8282          | 0.1569     | 0.3810             | 0.8590             |
| <i>SVM RBF</i>                                                                                                                                                                  | 0.6331     | 0.8528          | 0.1860     | 0.3810             | 0.8852             |
| <i>Decision Trees</i>                                                                                                                                                           | 0.4746     | 0.9356          | -          | 0                  | 1                  |
| <i>Boosted stumps</i>                                                                                                                                                           | 0.6911     | 0.9325          | 0.4286     | 0.1429             | 0.9869             |
| <b>Clinical model for stage 2 with age, sex, BMI, CRP, type of operation, time between operation and blood collection, stage of cancer, and log-transformed glycans (n=326)</b> |            |                 |            |                    |                    |
|                                                                                                                                                                                 | <b>AUC</b> | <b>Accuracy</b> | <b>PPV</b> | <b>Sensitivity</b> | <b>Specificity</b> |
| <i>Maximum Prior</i>                                                                                                                                                            | 0.5        | 0.9356          | -          | 0                  | 1                  |
| <i>k Nearest Neighbours</i>                                                                                                                                                     | 0.5912     | 0.8988          | 0.2273     | 0.2381             | 0.9443             |
| <i>LASSO</i>                                                                                                                                                                    | 0.7369     | 0.9356          | 0.5000     | 0.0476             | 0.9967             |
| <i>PAM</i>                                                                                                                                                                      | 0.6623     | 0.9356          | -          | 0                  | 1                  |
| <i>SVM linear</i>                                                                                                                                                               | 0.6537     | 0.7669          | 0.1429     | 0.5238             | 0.7836             |
| <i>SVM quadratic</i>                                                                                                                                                            | 0.5674     | 0.8957          | 0.1905     | 0.1905             | 0.9443             |
| <i>SVM cubic</i>                                                                                                                                                                | 0.4976     | 0.8896          | 0.0588     | 0.0476             | 0.9475             |
| <i>SVM RBF</i>                                                                                                                                                                  | 0.5        | 0.9356          | -          | 0                  | 1                  |
| <i>Decision Trees</i>                                                                                                                                                           | 0.4746     | 0.9356          | -          | 0                  | 1                  |
| <i>Boosted stumps</i>                                                                                                                                                           | 0.5864     | 0.9294          | 0.2500     | 0.0476             | 0.9902             |

**Supplementary Table 13 Predictions of rapid progressors in stage 3 for models with the extended set of clinical factors with and without glycans using k-nearest neighbour, LASSO, PAM, Support Vector Machines, Decision Trees, and Boosted Stump classifiers. The results are summarized over 10 cross-validation folds.**

| <b>Clinical model for stage 3 with age, sex, BMI, CRP, type of operation, time between operation and blood collection, and stage of cancer (n=312)</b>                          |            |                 |            |                    |                    |
|---------------------------------------------------------------------------------------------------------------------------------------------------------------------------------|------------|-----------------|------------|--------------------|--------------------|
|                                                                                                                                                                                 | <b>AUC</b> | <b>Accuracy</b> | <b>PPV</b> | <b>Sensitivity</b> | <b>Specificity</b> |
| <i>Maximum Prior</i>                                                                                                                                                            | 0.5        | 0.8782          | -          | 0                  | 1                  |
| <i>k Nearest Neighbours</i>                                                                                                                                                     | 0.4438     | 0.7596          | 0.0256     | 0.0263             | 0.8613             |
| <i>LASSO</i>                                                                                                                                                                    | 0.6259     | 0.8782          | -          | 0                  | 1                  |
| <i>PAM</i>                                                                                                                                                                      | 0.4802     | 0.8782          | -          | 0                  | 1                  |
| <i>SVM linear</i>                                                                                                                                                               | 0.5864     | 0.7115          | 0.1905     | 0.4211             | 0.7518             |
| <i>SVM quadratic</i>                                                                                                                                                            | 0.5412     | 0.6122          | 0.1453     | 0.4474             | 0.6350             |
| <i>SVM cubic</i>                                                                                                                                                                | 0.5133     | 0.6827          | 0.1325     | 0.2895             | 0.7372             |
| <i>SVM RBF</i>                                                                                                                                                                  | 0.5360     | 0.6827          | 0.1494     | 0.3421             | 0.7299             |
| <i>Decision Trees</i>                                                                                                                                                           | 0.4901     | 0.8782          | -          | 0                  | 1                  |
| <i>Boosted stumps</i>                                                                                                                                                           | 0.5965     | 0.8782          | -          | 0                  | 1                  |
| <b>Clinical model for stage 3 with age, sex, BMI, CRP, type of operation, time between operation and blood collection, stage of cancer, and log-transformed glycans (n=312)</b> |            |                 |            |                    |                    |
|                                                                                                                                                                                 | <b>AUC</b> | <b>Accuracy</b> | <b>PPV</b> | <b>Sensitivity</b> | <b>Specificity</b> |
| <i>Maximum Prior</i>                                                                                                                                                            | 0.5        | 0.8782          | -          | 0                  | 1                  |
| <i>k Nearest Neighbours</i>                                                                                                                                                     | 0.4972     | 0.7949          | 0.1176     | 0.1053             | 0.8905             |
| <i>LASSO</i>                                                                                                                                                                    | 0.5953     | 0.8782          | -          | 0                  | 1                  |
| <i>PAM</i>                                                                                                                                                                      | 0.5645     | 0.8814          | 1          | 0.0263             | 1                  |
| <i>SVM linear</i>                                                                                                                                                               | 0.5941     | 0.7051          | 0.1932     | 0.4474             | 0.7409             |
| <i>SVM quadratic</i>                                                                                                                                                            | 0.5169     | 0.7885          | 0.1500     | 0.1579             | 0.8759             |
| <i>SVM cubic</i>                                                                                                                                                                | 0.5107     | 0.8173          | 0.1481     | 0.1053             | 0.9161             |
| <i>SVM RBF</i>                                                                                                                                                                  | 0.5000     | 0.8782          | -          | 0                  | 1                  |
| <i>Decision Trees</i>                                                                                                                                                           | 0.4745     | 0.8782          | -          | 0                  | 1                  |
| <i>Boosted stumps</i>                                                                                                                                                           | 0.4483     | 0.8494          | 0.2353     | 0.1053             | 0.9526             |



**Supplementary Table 14 Predictions of rapid progressors in stage 4 for models with the extended set of clinical factors with and without glycans using k-nearest neighbour, LASSO, PAM, Support Vector Machines, Decision Trees, and Boosted Stump classifiers. The results are summarized over 10 cross-validation folds.**

| <b>Clinical model for stage 4 with age, sex, BMI, CRP, type of operation, time between operation and blood collection, and stage of cancer (n=102)</b>                          |            |                 |            |                    |                    |
|---------------------------------------------------------------------------------------------------------------------------------------------------------------------------------|------------|-----------------|------------|--------------------|--------------------|
|                                                                                                                                                                                 | <b>AUC</b> | <b>Accuracy</b> | <b>PPV</b> | <b>Sensitivity</b> | <b>Specificity</b> |
| <i>Maximum Prior</i>                                                                                                                                                            | 0.5        | 0.7059          | -          | 0                  | 1                  |
| <i>k Nearest Neighbours</i>                                                                                                                                                     | 0.5        | 0.5686          | 0.2941     | 0.3333             | 0.6667             |
| <i>LASSO</i>                                                                                                                                                                    | 0.4331     | 0.6961          | 0.3333     | 0.0333             | 0.9722             |
| <i>PAM</i>                                                                                                                                                                      | 0.4535     | 0.7059          | -          | 0                  | 1                  |
| <i>SVM linear</i>                                                                                                                                                               | 0.5514     | 0.5588          | 0.3404     | 0.5333             | 0.5694             |
| <i>SVM quadratic</i>                                                                                                                                                            | 0.5819     | 0.6569          | 0.4138     | 0.4000             | 0.7639             |
| <i>SVM cubic</i>                                                                                                                                                                | 0.5472     | 0.6078          | 0.3529     | 0.4000             | 0.6944             |
| <i>SVM RBF</i>                                                                                                                                                                  | 0.5278     | 0.6078          | 0.3333     | 0.3333             | 0.7222             |
| <i>Decision Trees</i>                                                                                                                                                           | 0.4899     | 0.7059          | -          | 0                  | 1                  |
| <i>Boosted stumps</i>                                                                                                                                                           | 0.5505     | 0.6471          | 0.3125     | 0.1667             | 0.8472             |
| <b>Clinical model for stage 4 with age, sex, BMI, CRP, type of operation, time between operation and blood collection, stage of cancer, and log-transformed glycans (n=102)</b> |            |                 |            |                    |                    |
|                                                                                                                                                                                 | <b>AUC</b> | <b>Accuracy</b> | <b>PPV</b> | <b>Sensitivity</b> | <b>Specificity</b> |
| <i>Maximum Prior</i>                                                                                                                                                            | 0.5        | 0.7059          | -          | 0                  | 1                  |
| <i>k Nearest Neighbours</i>                                                                                                                                                     | 0.5819     | 0.6569          | 0.4138     | 0.4000             | 0.7639             |
| <i>LASSO</i>                                                                                                                                                                    | 0.5815     | 0.6863          | 0          | 0                  | 0.9722             |
| <i>PAM</i>                                                                                                                                                                      | 0.5257     | 0.6765          | 0          | 0                  | 0.9583             |
| <i>SVM linear</i>                                                                                                                                                               | 0.5972     | 0.6373          | 0.4054     | 0.5000             | 0.6944             |
| <i>SVM quadratic</i>                                                                                                                                                            | 0.5778     | 0.6373          | 0.3939     | 0.4333             | 0.7222             |
| <i>SVM cubic</i>                                                                                                                                                                | 0.6486     | 0.7647          | 0.6875     | 0.3667             | 0.9306             |
| <i>SVM RBF</i>                                                                                                                                                                  | 0.5000     | 0.7059          | -          | 0                  | 1                  |
| <i>Decision Trees</i>                                                                                                                                                           | 0.6569     | 0.7353          | 0.6154     | 0.2667             | 0.9306             |
| <i>Boosted stumps</i>                                                                                                                                                           | 0.5565     | 0.6863          | 0.4500     | 0.3000             | 0.8472             |

**Supplementary Table 15 Studies on IgG glycosylation changes in cancer**

| Author                       | Year | Cancer           | Method                                                                                        | Samples | Cases | Controls | Results                                                                                                                                                                                                                                                                                                            |
|------------------------------|------|------------------|-----------------------------------------------------------------------------------------------|---------|-------|----------|--------------------------------------------------------------------------------------------------------------------------------------------------------------------------------------------------------------------------------------------------------------------------------------------------------------------|
| <b>Galactosylation</b>       |      |                  |                                                                                               |         |       |          |                                                                                                                                                                                                                                                                                                                    |
| Kanoh Y <sup>4</sup>         | 2004 | Prostate cancer  | Fluorophore-assocd. carbohydrate electrophoresis (FACE)                                       | serum   | 12    | 10       | Fr 1 (monogalactosyl oligosaccharide) and Fr 2 (digalactosyl oligosaccharide) decreased significantly (p<0.05), while Fr 4 (agalactosyl IgG oligosaccharide) increased with PCa tumor progression. The Fr 4 / Fr 1 + 2 ratio in metastatic PCa patients was significantly higher than in healthy controls (p<0.05) |
| Aurer I <sup>5</sup>         | 2007 | Multiple myeloma | Lectin blotting and densitometry                                                              | blood   | 16    | 16       | IgG galactosylation was reduced in multiple myeloma                                                                                                                                                                                                                                                                |
| Kodar K <sup>6</sup>         | 2011 | Gastric cancer   | LC-ESI-MS                                                                                     | serum   | 80    | 51       | Significant increase of agalactosylated (GnGnF, GnGn(bi)F), and decrease of galactosylated (AGn(bi), AGn(bi)F, AA(bi), AAF)                                                                                                                                                                                        |
| Bones J <sup>7</sup>         | 2011 | Gastric cancer   | Hydrophilic interaction liquid chromatography with fluorescence detection                     | serum   | 80    | 30       | The data indicates that in the cancerous state there is a switch in IgG production toward the more pro-inflammatory IgG G0 glycoform (agalactosyl).                                                                                                                                                                |
| Gercel-Taylor C <sup>8</sup> | 2001 | Ovarian cancer   | Concanavalin A affinity columns and sodium dodecyl sulfate-polyacrylamide gel electrophoresis | serum   | 62    | 50       | This report demonstrated the presence of an aberrantly glycosylated IgG population in cancer patients.                                                                                                                                                                                                             |
| Saldova R <sup>9</sup>       | 2007 | Ovarian cancer   | Quantitative NPHPLC and exoglycosidase digestion                                              | serum   | 27    | 34       | IgG containing agalactosylated structures (G0) (mostly represented by FA2) were doubled; monogalactosylated (G1) decreased; digalactosylated (G2) structures decreased                                                                                                                                             |

|                           |      |                  |                                                                                              |       |    |    |                                                                                                                                                              |
|---------------------------|------|------------------|----------------------------------------------------------------------------------------------|-------|----|----|--------------------------------------------------------------------------------------------------------------------------------------------------------------|
| Alley WR <sup>10</sup>    | 2012 | Ovarian cancer   | MALDI-TOF Mass-spectrometric Analysis                                                        | serum | 19 | 20 | Increased levels of a-galactosylation structures were obsd. on N-linked glycans derived from IgG, which were independent of the presence of fucose residues. |
| Qian Y <sup>11</sup>      | 2013 | Ovarian cancer   | MALDI-TOF Mass-spectrometric Analysis                                                        | serum | 32 | 26 | G0/(G1 + G2·2) was found significantly higher in the malignant group than in the benign group (0.74 vs 0.34; p < 0.0001)                                     |
| <b>Sialylation</b>        |      |                  |                                                                                              |       |    |    |                                                                                                                                                              |
| Flemming SC <sup>12</sup> | 1998 | Multiple myeloma | High pressure anion exchange chromatography with pulsed electrochemical detection (HPAE-PED) | serum | 47 | 14 | Patients with myeloma showed an increase in the proportion of sialylated oligosaccharides in comparison with patients with MGUS                              |
| Salдова R <sup>9</sup>    | 2007 | Ovarian cancer   | Quantitative NPHPLC and exoglycosidase digestion                                             | serum | 27 | 34 | The overall sialylation decreased                                                                                                                            |
| Kodar K <sup>6</sup>      | 2011 | Gastric cancer   | LC-ESI-MS                                                                                    | serum | 80 | 51 | Decrease of monosialylated IgG glycoforms (NaAF, NaA(bi)) in cancer patients.                                                                                |
| <b>Bisecting GlcNAc</b>   |      |                  |                                                                                              |       |    |    |                                                                                                                                                              |
| Kodar K <sup>6</sup>      | 2011 | Gastric cancer   | LC-ESI-MS                                                                                    | serum | 80 | 51 | A statistically significant decrease of bisecting GlcNAc was observed in tumour stage II and III                                                             |

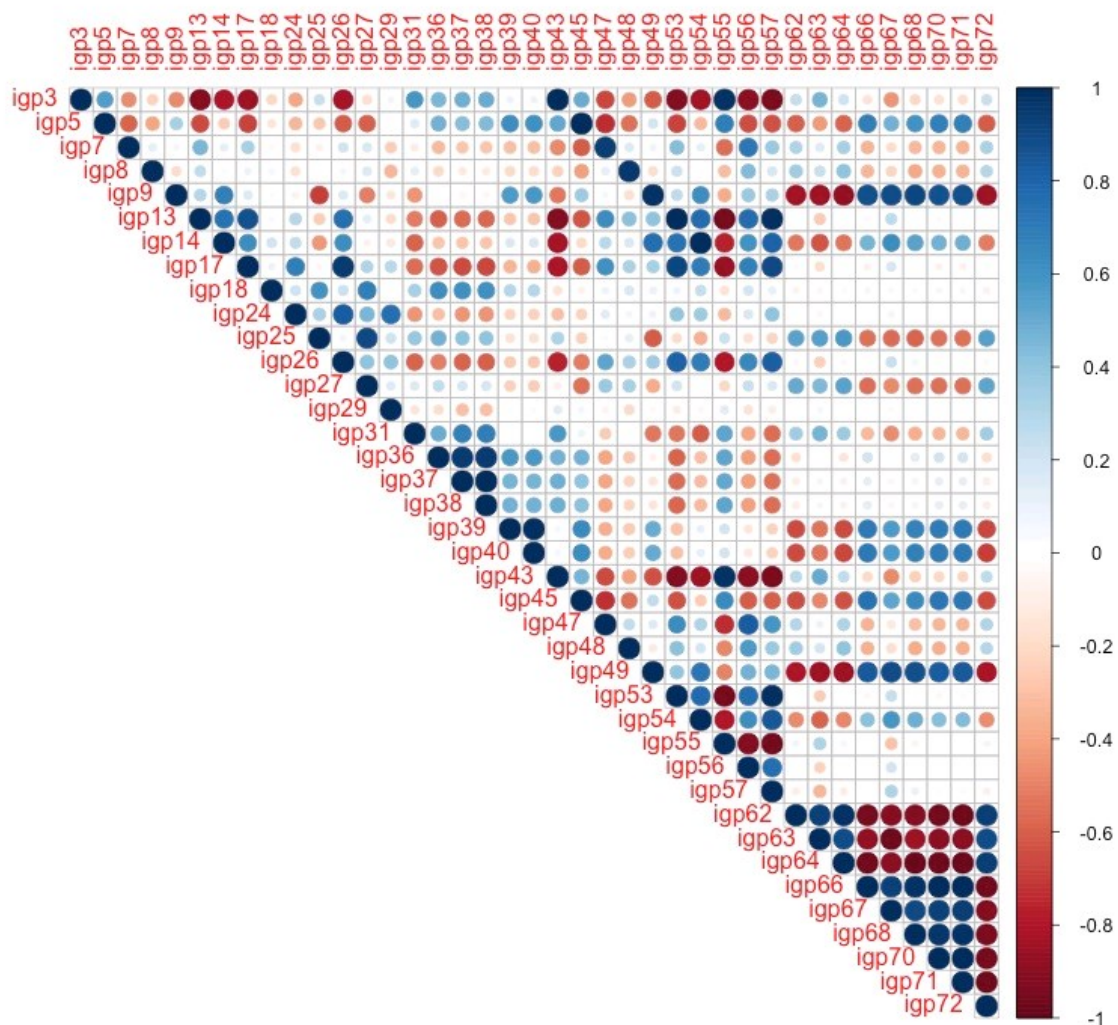

Supplementary Figure 1 Correlation matrix for robust measured and derived glycans

## Supplementary Section: Model Selection

### **One classifier vs multiple classifiers**

In life and clinical sciences, it is common to analyse the predictive performance by using an arbitrarily chosen single regression or classification model such as linear regression for continuous outcomes or logistic regression for binary outcomes, without motivating the model choice. There are multiple models that may in principle be considered for continuous and binary outcomes, and deeper insights about the utility of biomarkers may potentially be obtained by evaluating many such models. We note that the analysis of the predictive performance based on a single model may be misleading, due to the following observations: (i) It may happen that by considering a single model, researchers observe that biomarkers do not improve the quality of predictions. But this observation may be an artefact of the implied modelling constraints (such as the linear decision surface separating cases from controls in logistic regression). One reason for failing to demonstrate an improvement in predictions may be the fact that the chosen predictive model was limited and inappropriate for the dataset. The biomarkers may still be useful predictors, but the researchers may be making incorrect assumptions about the data and using a wrong model, without trying to evaluate whether the modelling assumptions are correct. (ii) A similar argument may hold for a subset of variables. For example, researchers may be able to demonstrate that a common model such as logistic regression with covariates defined by biomarkers and clinical variables outperforms logistic regression that only uses clinical variables, and may conclude that the biomarkers are generally useful for predicting the considered outcome. However, it may happen that the logistic assumption is particularly unfavourable to the clinical model (for example, when the mapping from the clinical variables to the outcomes is complex, and the classification surface cannot be well modelled by a hyperplane in the subspace of clinical variables). In this case, a clinical model of some other class (for example, an SVM) that does not use the biomarkers could significantly outperform models with biomarkers. In this case, the conclusion that the biomarkers are useful for developing a

diagnostics, may be misleading - one may be able to achieve a superior quality of predictions when considering "richer" clinical models (something overlooked by considering model of a single class).

We note that the assessment of the predictive performance by considering a single model may often be limited, and the results may need to be interpreted with some care. This work is an empirical attempt to overcome the arbitrariness of a specific model choice. In particular, we considered a larger set of models that make different assumptions about the mapping from glycans to outcomes. We use (nested) cross-validation to estimate the predictive performance on new previously unseen data. We then compare pairs of models of the same class that use clinical variables only and clinical variables with glycans, and test how likely it is that using glycans for predictions leads to improvements over clinical models independently of the modelling assumptions. (Note that the models are generally not nested even when they belong to the same class – so we cannot use standard tests). As the evaluation criterion, we use the AUC computed by cross-validation over the test folds of data. In some sense, rather than comparing an arbitrary model with or without glycans, we are evaluating how easy it may be to use glycomic biomarkers to construct a superior diagnostic independently of the modelling details.

### **Model Selection for Cross-Validation**

We decided to approximate the performance on unused test data, where a possible chance improvement in the performance on training data is compensated by an implied penalty on the increased model complexity (Cherkassky and Mulier, 2007; Hastie, Tibshirani, and Friedman, 2009, see Chapter 7 in particular), because addition of uninformative covariates could have chance effects.

Cross-validation fits multiple models and tests them on non-overlapping sets of unused data. In contrast to fitting a single model to a complete dataset, this has the advantage of providing an approximately unbiased estimate of the expected performance in a new cohort, if the training and

validation samples are drawn from the same distribution (e.g. Hastie, Tibshirani, and Friedman (2009)). However, cross-validation has the disadvantage that there is no universal unbiased estimator of the variance of cross-validation estimates, which significantly complicates statistical testing (Bengio and Grandvalet, 2004), and which poses one of the big unsolved statistical problems in the area (Arlot and Celisse, 2010). This makes it important to choose an evaluation strategy: that is, to evaluate all models on the training dataset where statistical tests may be available, or to compute the expected performance on out-of-sample data – using cross-validation or similar evaluation techniques – at the expense of not being able to provide rigorous unbiased estimates of the error bars on the estimated performance. We insist that cross-validation is a general and appropriate strategy of assessing classifiers on new data, as the samples used for validations are independent from the training data, so at least the estimates of the mean performance are asymptotically unbiased (also see discussions in Hastie, Tibshirani, and Friedman (2009), Chapter 7, and Arlot and Celisse (2010), Section 4). However, despite its generality and wide use, some theoretical issues about cross-validation are still widely open (see e.g. Arlot and Celisse, 2010, Section 10). Demsar (2006) suggests Wilcoxon signed ranks or Friedman tests to compare multiple classifiers on large independent datasets; we use the former for comparing multiple models in the context discussed earlier.

Arlot and Celisse (2010). A survey of cross-validation procedures for model selection. *Stat Surveys* 4:40-79.

Bengio and Grandvalet (2004). No Unbiased Estimator of the Variance of K-Fold Cross-Validation. *JMLR* 5:1089-1105.

Cherkassky and Mulier (2007). *Learning from Data* (2<sup>nd</sup> ed.). Wiley.

Demsar (2006). Statistical Comparison of Classifiers over Multiple Datasets. *JMLR* 7:1-30.

Hastie, Tibshirani, Friedman (2009). *The Elements of Statistical Learning* (2<sup>nd</sup> ed.). Springer.





## References

1. Arlot S, Celisse A. A survey of cross-validation procedures for model selection. *Statistics surveys* 2010;4:40-79.
2. Bengio Y, Grandvalet Y. No unbiased estimator of the variance of k-fold cross-validation. *Mach Learn Res* 2004;5:1089-105.
3. Markatou M, Tian H, Biswas S, Hripcsak GM. Analysis of variance of cross-validation estimators of the generalization error. *J Mach Learn Res* 2005;6:1127-68.
4. Kanoh Y, Mashiko T, Danbara M, Takayama Y, Ohtani S, Egawa S, et al. Changes in serum IgG oligosaccharide chains with prostate cancer progression. *Anticancer Res* 2004;24(5B):3135-9.
5. Aurer I, Lauc G, Dumic J, Rendic D, Maticic D, Milos M, et al. Aberrant glycosylation of IgG heavy chain in multiple myeloma. *Coll Antropol* 2007;31(1):247-51.
6. Kodar K, Stadlmann J, Klaamas K, Sergeyev B, Kurtenkov O. Immunoglobulin G Fc N-glycan profiling in patients with gastric cancer by LC-ESI-MS: relation to tumor progression and survival. *Glycoconj J* 2012;29(1):57-66.
7. Bones J, Byrne JC, O'Donoghue N, McManus C, Scaife C, Boissin H, et al. Glycomic and glycoproteomic analysis of serum from patients with stomach cancer reveals potential markers arising from host defense response mechanisms. *J Proteome Res* 2011;10(3):1246-65.
8. Gercel-Taylor C, Bazzett LB, Taylor DD. Presence of aberrant tumor-reactive immunoglobulins in the circulation of patients with ovarian cancer. *Gynecol Oncol* 2001;81(1):71-6.
9. Saldova R, Royle L, Radcliffe CM, Abd Hamid UM, Evans R, Arnold JN, et al. Ovarian cancer is associated with changes in glycosylation in both acute-phase proteins and IgG. *Glycobiology* 2007;17(12):1344-56.
10. Alley WR, Jr., Vasseur JA, Goetz JA, Svoboda M, Mann BF, Matei DE, et al. N-linked glycan structures and their expressions change in the blood sera of ovarian cancer patients. *J Proteome Res* 2012;11(4):2282-300.
11. Qian Y, Wang Y, Zhang X, Zhou L, Zhang Z, Xu J, et al. Quantitative analysis of serum IgG galactosylation assists differential diagnosis of ovarian cancer. *J Proteome Res* 2013;12(9):4046-55.
12. Fleming SC, Smith S, Knowles D, Skillen A, Self CH. Increased sialylation of oligosaccharides on IgG paraproteins--a potential new tumour marker in multiple myeloma. *J Clin Pathol* 1998;51(11):825-30.
